# Supplementary material for: Heterogeneous preferences for living in a hydrogen home: an advanced multigroup analysis
Source: Royal Society of Chemistry journal article supplement (doi:10.1039/d4se00392f), 2024-01-01
Supplement: d4se00392f1.pdf [file d4se00392f1.pdf]

## Supplementary information

### Heterogenous preferences for living in a hydrogen home: An advanced multigroup analysis

Joel A. Gordon<sup>a</sup>, Nazmiye Balta-Ozkan<sup>a</sup>, Anwar Haq<sup>b</sup> Seyed Ali Nabavi<sup>a</sup>

<sup>a</sup> School of Water, Energy and Environment, Cranfield University, Bedford, UK

<sup>b</sup> Newcastle Business School, Northumbria University, London, UK

**Data availability:** <https://doi.org/10.17862/cranfield.rd.24517966.v1>

## Contents

|        |                                                                                       |    |
|--------|---------------------------------------------------------------------------------------|----|
| 1      | Supplementary Note 1: Comments on meta-review of 54 studies on hydrogen heating       | 3  |
| 2      | Supplementary Note 2: Survey questions and supporting literature                      | 6  |
| 3      | Supplementary Note 3: Sample characteristics and comparison to UK population          | 9  |
| 4      | Supplementary Note 4: Statistical tests for validating sample size specifications     | 12 |
| 5      | Supplementary Note 5: Common method bias                                              | 14 |
| 6      | Supplementary Note 6: Skewness and kurtosis                                           | 15 |
| 7      | Supplementary Note 7: Limitations of the Kruskal-Wallis H test                        | 17 |
| 8      | Supplementary Note 8: Ceiling line results from NCA                                   | 18 |
| 9      | Supplementary Note 9: Segmentation-based methods                                      | 19 |
| 10     | Supplementary Note 10: Summary of studies with a multigroup research focus            | 21 |
| 11     | Supplementary Note 11: Evidence on public perceptions of hydrogen from Australia      | 23 |
| 12     | Supplementary Note 12: The role of perceived benefits in technology acceptance models | 24 |
| 13     | Supplementary Note 13: Kruskal-Wallis H Test results for adoption factors             | 26 |
| 13.1   | Safety Perceptions                                                                    | 26 |
| 13.2   | Technology Perceptions                                                                | 26 |
| 13.3   | Financial Perceptions                                                                 | 26 |
| 13.4   | Perceived Socio-economic Costs                                                        | 27 |
| 13.5   | Production Perceptions                                                                | 27 |
| 13.6   | Distribution of accepters and rejecters of hydrogen homes                             | 28 |
| 14     | Supplementary Note 14: Measurement model assessment                                   | 29 |
| 15     | Supplementary Note 15: Measurement model assessment for higher-order construct        | 32 |
| 16     | Supplementary Note 16: Structural model assessment                                    | 35 |
| 17     | Supplementary Note 17: Cross-validated predictive ability test                        | 37 |
| 18     | Supplementary Note 18: Importance-performance map analysis                            | 39 |
| 18.1   | Summary of importance-performance map analysis for each consumer sub-group            | 42 |
| 18.1.1 | Baseline Group                                                                        | 42 |
| 18.1.2 | Moderately Engaged Group                                                              | 42 |
| 18.1.3 | Very Engaged Group                                                                    | 42 |
| 18.1.4 | Fuel Stressed Group                                                                   | 43 |
| 19     | Supplementary Note 19: Bottleneck results for necessary condition analysis            | 44 |
| 20     | Supplementary Note 20: Necessary condition analysis scatterplots                      | 46 |

## 1 Supplementary Note 1: Comments on meta-review of 54 studies on hydrogen heating

The meta-review article on hydrogen heating by Jan Rosenow<sup>1</sup> – which advances his earlier review of 32 studies<sup>2</sup> – has a somewhat diverse representation of studies, however, the main concentration corresponds to the United Kingdom (N = 17), Germany (N = 10), in addition to a focus on the European Union (N = 12), and global analyses (N = 14). Although 54 articles are retrieved, one study examines Czechia, Italy, Poland, and Spain, while another focuses on Germany, the EU, and globally, which explains the discrepancy in Table S1 and Fig. S1. However, the report conducted by Element Energy<sup>3</sup> for Czechia, Italy, Poland, and Spain has little comparability to the UK context, as inferred within the text:

One limitation of using hydrogen for heating is that it is reliant on the existence of a hydrogen network. This could be a repurposed existing gas network or a new bespoke hydrogen network. No more than 40% of dwellings are currently connected to the gas grid in any of the countries analysed, with this number dropping to only 10% in Poland, highlighting a possible infrastructural risk for using hydrogen for heating on a large scale.

Other sources collated for the purpose of disproving the economic feasibility of hydrogen for heating present several limitations in their modelling approaches. For example, in the German context, Giehl et al.<sup>4</sup> acknowledge the following:

“Furthermore, the results are based on the assumption that in all counties parts of the heat demand will be supplied via hydrogen from converted gas distribution grids. However, in the case of using hydrogen to provide decentral heat, this might not be the case. Hydrogen could be used only in preferable regions, and this would lead to a different transition pathway. This issue could be resolved by identifying different regional clusters and modelling the transition pathway of the distribution grids individually.”

However, Rosenow extracts one unique point from the article: “*Total annual energy system cost in the hydrogen scenario is more than four times higher than in the electrification scenario*” for 2050.

In the Dutch context, Rosenow cites the study of Scheepers et al.<sup>5</sup> according to a conclusion that 1–9% of heating is provided by hydrogen by 2050. While we could not retrieve the data showing this range, and contend that the upper range is relevant, Scheepers and colleagues<sup>5</sup> acknowledge the following contextual dynamics in their modeling results:

“Hydrogen also becomes an important energy carrier, notably for transportation and in industry. If import prices are lower than costs of domestic production from natural gas with CCS or through electrolysis from renewable electricity (2.4–2.7 €/kgH<sub>2</sub>), the use of hydrogen increases, especially in the built environment.”

Additionally, in the Brazilian context (Sao Paulo) Jalil-Vega and colleagues<sup>6</sup> discuss a New Policies Decarbonisation (NP-DEC) scenario where hydrogen boilers reach 40% of the domestic sector capacity during a transition period between 2030 and 2045.

Irrespective of these observations, the meta-review<sup>1</sup> acknowledges that hydrogen heating may play a niche role, as reflected by the following results under cost-optimal conditions: a 10% of EU capacity by 2050 (European Commission); 4% of global capacity by 2050 (Bloomberg New Energy Foundation); 6% of UK capacity by 2050. It follows that dismissing the utility of engaging with the dynamics of the domestic hydrogen transition, whether from a techno-economic or social acceptability perspective, may be somewhat premature and potentially misguided.

**Table S1. Summary of contextual dynamics composing the meta-review on hydrogen heating (N = 54).**

| <b>Context of analysis</b> | <b>Number of studies</b> |
|----------------------------|--------------------------|
| European Union             | 9                        |
| European Union 27+UK       | 3                        |
| Germany                    | 10                       |
| Global                     | 14                       |
| Netherlands                | 2                        |
| Switzerland                | 1                        |
| United Kingdom             | 14                       |
| Brazil (Sao Paulo)         | 1                        |
| United States (California) | 1                        |
| Spain                      | 1                        |
| Italy                      | 1                        |
| Czechia                    | 1                        |
| Poland                     | 1                        |

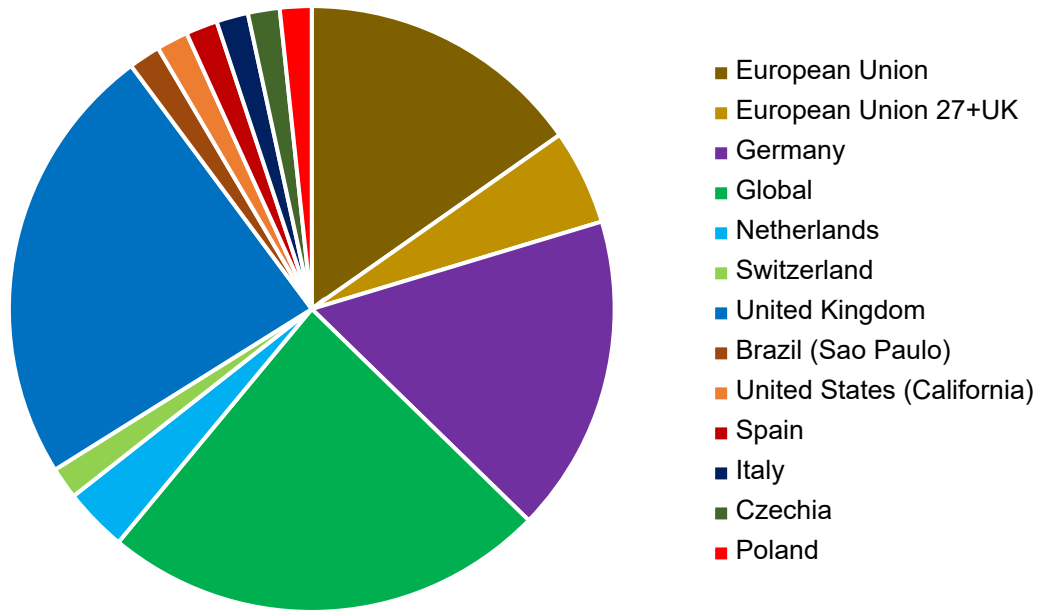

**Fig. S1. Visual distribution of research context composing the meta-review (N = 54).**

## 2 Supplementary Note 2: Survey questions and supporting literature

Table S2 provides full details of the survey questions pertaining to each construct and its respective indicators, as well as the scales employed, in addition to the supporting literature for deriving each item.

**Table S2. Questionnaire details and literature sources.**

| <b>Construct</b>                          | <b>Indicator</b> | <b>Question items and framing</b>                                                                                                                    | <b>Scale</b>                                   | <b>Supporting literature</b> |
|-------------------------------------------|------------------|------------------------------------------------------------------------------------------------------------------------------------------------------|------------------------------------------------|------------------------------|
| <b>Perceived Boiler Performance (BLR)</b> |                  | Please evaluate the following statements about a hydrogen boiler:                                                                                    | 0–10:<br>Low expectation –<br>High expectation | 7–14                         |
|                                           | BLR1             | I expect a hydrogen boiler to provide a higher level of thermal comfort than a natural gas boiler (i.e. satisfactory level and distribution of heat) |                                                |                              |
|                                           | BLR2             | I expect a hydrogen boiler to be more energy efficient than a natural gas boiler                                                                     |                                                |                              |
|                                           | BLR3             | I expect a hydrogen boiler to be easier to operate than a natural gas boiler                                                                         |                                                |                              |
|                                           | BLR4             | I expect a hydrogen boiler to provide a smarter heating system than a gas boiler                                                                     |                                                |                              |
| <b>Perceived Hob Performance (HOB)</b>    |                  | Please evaluate the following statements about a hydrogen hob:                                                                                       | 0–10:<br>Low expectation –<br>High expectation | 7,8                          |
|                                           | HOB1             | I expect a hydrogen hob to perform more efficiently than a natural gas hob                                                                           |                                                |                              |
|                                           | HOB2             | I expect a hydrogen hob to provide better cooking control than a natural gas hob                                                                     |                                                |                              |
|                                           | HOB3             | I expect a hydrogen hob to be easier to maintain and clean than a natural gas hob                                                                    |                                                |                              |
|                                           | HOB4             | I expect a hydrogen hob to provide a smarter cooking system than a natural gas hob                                                                   |                                                |                              |
| <b>Financial Perceptions (FP)</b>         | FP1              | What is your expectation for the purchasing price of a hydrogen boiler compared to a gas boiler?                                                     | 1–5: Significantly cheaper –                   | 15–20                        |

|                                             |      |                                                                                                                                                      |                                               |                |
|---------------------------------------------|------|------------------------------------------------------------------------------------------------------------------------------------------------------|-----------------------------------------------|----------------|
|                                             | FP2  | What is your expectation for the purchasing price of a hydrogen hob compared to a gas hob?                                                           | Significantly more expensive                  |                |
|                                             | FP3  | What is your expectation when considering potential energy bills for domestic hydrogen compared to natural gas?                                      |                                               |                |
| <b>Perceived socio-economic Costs (PSC)</b> |      | To what extent do you agree or disagree with the following statements:                                                                               | 1–5:<br>Strongly disagree –<br>Strongly agree | 15,16,19,21–23 |
|                                             | PSC1 | Switching from natural gas to hydrogen will have a negative impact on UK energy security (i.e. reliability of energy supply)                         |                                               |                |
|                                             | PSC2 | Switching from natural gas to hydrogen will lead to higher levels of fuel poverty across the UK                                                      |                                               |                |
| <b>Safety Perceptions (SP)</b>              |      | Please evaluate your current safety perceptions of hydrogen compared to natural gas for the following:                                               | 0–10:<br>Less safe – More safe                | 7,16,24–30     |
|                                             | SP1  | Hydrogen boilers                                                                                                                                     |                                               |                |
|                                             | SP2  | Hydrogen hobs                                                                                                                                        |                                               |                |
|                                             | SP3  | Hydrogen pipelines (i.e. transport/transmission)                                                                                                     |                                               |                |
|                                             | SP4  | Underground storage of hydrogen gas                                                                                                                  |                                               |                |
|                                             | SP5  | Overall, how do you perceive the safety level of hydrogen compared to natural gas in terms of production, storage, transportation, and domestic use? |                                               |                |
| <b>Production Perceptions (PP)</b>          | PP1  | What is your attitude towards the UK government supporting blue hydrogen production in the short-term (i.e. up to 2030)?                             | 0–10:<br>Opposed –<br>Supportive              | 24,25,31–34    |
|                                             | PP2  | What is your attitude towards the UK government supporting blue hydrogen production over the long-term (i.e. after 2030)?                            |                                               |                |
|                                             | PP3  | What is your attitude towards the UK government supporting green hydrogen production in the short-term (i.e. up to 2030)?                            |                                               |                |
|                                             | PP4  | What is your attitude towards the UK government supporting green hydrogen production over the long-term (i.e. after 2030)?                           |                                               |                |

PP5 How do you feel about the government's twin-track strategy? (i.e. with a role for blue and green hydrogen)

---

**Perceived Adoption Potential (PAP)**

|      |                                                                                                                                    |                                                |          |
|------|------------------------------------------------------------------------------------------------------------------------------------|------------------------------------------------|----------|
| PAP1 | What is your level of willingness to switch to a hydrogen boiler before 2030?                                                      | 1–5: Not willing at all<br>– Extremely willing | 19,35–37 |
| PAP2 | What is your level of willingness to switch to a hydrogen hob before 2030?                                                         |                                                |          |
| PAP3 | What is your level of willingness to switch to a hydrogen home before 2030? (i.e. both hydrogen heating and cooking)               |                                                |          |
| PAP4 | What is your expectation for hydrogen homes delivering economic benefits such as job opportunities and income security?            | 0–10:<br>Low – High<br>expectation             | 15,38–42 |
| PAP5 | What is your expectation for hydrogen homes delivering social benefits such as reduced levels of fuel poverty and improved health? |                                                |          |
| PAP6 | What is your expectation for hydrogen homes delivering environmental benefits such lower carbon emissions and better air quality?  |                                                |          |

---



### 3 Supplementary Note 3: Sample characteristics and comparison to UK population

Table S3 describes the breakdown of each consumer sub-group composing our survey sample (N =1845). The ideal target was to secure an equally balanced representation among three of sub-groups (i.e. MEG, VEG, FSG), alongside a larger Baseline Group (BLG) of ~40%. Higher occurrences of incomplete answers and straight-lining responses resulted in a final sample of 677 for the BLG (~36.7%). During the data collection, the Very Engaged Group (VEG) proved harder to reach, leading to partial under-representation (N = 331, 17.9%). By comparison, the Moderately Engaged Group (MEG) was easier to secure and somewhat over-represented (24.8%). Finally, the Fuel Stress Group (FSG) was in line with the original quotas (20.5%).

**Table S3. Consumer sub-groups composing the survey sample.**

| <b>Socio-demographic variable</b> | <b>BLG<br/>(N = 677)</b> | <b>MEG<br/>(N = 458)</b> | <b>VEG<br/>(N = 331)</b> | <b>FSG<br/>(N = 379)</b> | <b>Standard deviation</b> | <b>Full sample<br/>(N = 1845)</b> | <b>UK population</b> | <b>Difference (%)</b> |
|-----------------------------------|--------------------------|--------------------------|--------------------------|--------------------------|---------------------------|-----------------------------------|----------------------|-----------------------|
| <b>Age</b>                        |                          |                          |                          |                          |                           |                                   |                      |                       |
| 18-34                             | 34.1                     | 31.7                     | 38.7                     | 39.8                     | 3.82                      | 35.5                              | 32.6                 | +2.9                  |
| 35-54                             | 41.7                     | 37.3                     | 33.2                     | 42.2                     | 4.22                      | 39.2                              | 30.6                 | +8.6                  |
| 55+                               | 24.2                     | 31.0                     | 28.1                     | 17.9                     | 5.67                      | 25.3                              | 36.8                 | -11.5                 |
| <b>Gender</b>                     |                          |                          |                          |                          |                           |                                   |                      |                       |
| Male                              | 36.8                     | 42.6                     | 56.5                     | 47.2                     | 8.32                      | 43.9                              | 48.8                 | -4.9                  |
| Female                            | 63.2                     | 57.4                     | 43.5                     | 52.8                     | 8.32                      | 56.1                              | 51.2                 | +4.9                  |
| Other                             |                          |                          |                          |                          |                           |                                   |                      |                       |
| <b>Housing tenure</b>             |                          |                          |                          |                          |                           |                                   |                      |                       |
| Owned outright                    | 34.7                     | 36.0                     | 47.4                     | 34.3                     | 6.24                      | 37.2                              | 57.1                 | -19.9                 |
| Mortgage owner                    | 65.3                     | 64.0                     | 52.6                     | 65.7                     | 6.24                      | 62.8                              | 42.9                 | +19.9                 |
| <b>Housing type</b>               |                          |                          |                          |                          |                           |                                   |                      |                       |
| Flat, apartment or bungalow       | 12.3                     | 9.2                      | 16.6                     | 12.4                     | 3.04                      | 12.3                              | 30.0                 | -17.7                 |
| Detached house                    | 29.1                     | 30.8                     | 30.8                     | 25.3                     | 2.59                      | 29.1                              | 18.0                 | +11.1                 |
| Semi-detached house               | 36.9                     | 42.1                     | 35.3                     | 39.6                     | 3.00                      | 38.5                              | 25.0                 | +13.5                 |
| Terrace house                     | 21.7                     | 17.9                     | 17.2                     | 22.7                     | 2.73                      | 20.2                              | 27.0                 | -6.8                  |
| <b>No. of occupants</b>           |                          |                          |                          |                          |                           |                                   |                      |                       |
| 1                                 | 11.7                     | 10.0                     | 9.1                      | 7.9                      | 1.60                      | 10.0                              | n/a                  |                       |
| 2                                 | 30.6                     | 32.3                     | 26.0                     | 30.6                     | 2.70                      | 30.2                              | n/a                  |                       |

|                                           |      |      |      |      |      |      |      |      |
|-------------------------------------------|------|------|------|------|------|------|------|------|
| 3+                                        | 57.8 | 57.6 | 65.0 | 61.5 | 3.51 | 59.8 | n/a  |      |
| <b>Education level</b>                    |      |      |      |      |      |      |      |      |
| GCSE/O-Level or lower                     | 24.2 | 17.9 | 18.7 | 24.5 | 3.51 | 21.7 | n/a  |      |
| Vocational/NVQ                            | 27.0 | 25.8 | 17.5 | 23.2 | 4.23 | 24.2 | n/a  |      |
| Postgraduate qualification                | 17.7 | 23.1 | 26.3 | 21.4 | 3.58 | 21.4 | n/a  |      |
| Degree or equivalent                      | 31.0 | 33.2 | 37.5 | 30.9 | 3.09 | 32.7 | n/a  |      |
| <b>Annual income bracket (before tax)</b> |      |      |      |      |      |      |      |      |
| Less than £23,500                         | 30.1 | 27.1 | 16.9 | 28.0 | 5.89 | 26.6 | n/a  |      |
| More than £23,500 but less than £31,500   | 20.7 | 19.4 | 16.9 | 26.1 | 3.88 | 20.8 | n/a  |      |
| More than £31,500 but less than £41,500   | 18.9 | 18.6 | 19.0 | 19.0 | 0.19 | 18.9 | n/a  |      |
| More than £41,500 but less than £62,500   | 20.7 | 23.1 | 23.9 | 19.8 | 1.94 | 21.7 | n/a  |      |
| More than £62,500                         | 9.6  | 11.8 | 23.3 | 7.1  | 7.16 | 12.1 | n/a  |      |
| <b>Location</b>                           |      |      |      |      |      |      |      |      |
| Southwest and Wales                       | 11.7 | 15.3 | 11.5 | 11.6 | 1.85 | 12.5 | 13.4 | -0.9 |
| Midlands and East of England              | 27.8 | 25.8 | 22.1 | 25.3 | 2.36 | 25.7 | 26.2 | -0.5 |
| Southeast and London                      | 26.0 | 28.6 | 35.3 | 22.2 | 5.52 | 27.5 | 27.2 | +0.3 |
| North of England and Scotland             | 34.6 | 30.3 | 31.1 | 40.9 | 4.83 | 34.2 | 33.0 | +1.2 |
| <b>Area type</b>                          |      |      |      |      |      |      |      |      |
| Inner City or industrial                  | 6.5  | 7.6  | 12.7 | 11.6 | 3.01 | 8.9  | n/a  |      |
| Suburban                                  | 54.7 | 56.3 | 44.7 | 48.8 | 5.36 | 52.1 | n/a  |      |
| Urban                                     | 19.1 | 17.7 | 28.4 | 24.8 | 4.99 | 21.6 | n/a  |      |
| Rural                                     | 19.8 | 18.3 | 14.2 | 14.8 | 2.71 | 17.4 | n/a  |      |

**Source:** Authors' compilation based on<sup>43-45</sup>.

<sup>a</sup> n/a denotes the decision to exclude these variables when setting quotas, therefore population data is not reported here.

The sample was composed of respondents owning a property outright (57.1%) and mortgage owners (42.9%), following the logic that home ownership will raise the stakes for decision-making and consumer engagement regarding domestic hydrogen.<sup>46</sup> Moreover, all respondents were users of natural gas boiler and hobs; attributing at least moderate levels of important to being able to choose these technologies, while having at least moderate levels of financial involvement in the decision-making process.<sup>7,11,47</sup>

The sampling decision reflects the under-representation of respondents living in a bungalow, flat, or apartment within the sample (12.3% compared to the national average of 30.0%). Relatedly, in the Welsh context, Thomas et al.<sup>48</sup> reported that “bungalows (11.5%) and flats (11%) represent a smaller proportion of the overall housing stock, with the latter less reliant on gas heating due to safety and planning regulation.” Notably, 40.9% of fuel stressed respondents in this study are from the North of England and Scotland, compared to the sample average of 34.2%, which reflects the decision to adjust the location filter for the FSG to be broadly nationally representative of fuel poverty in the UK.<sup>49</sup>

Fig. S2 reports the composition of the sample in relation to levels of involvement in financial decision-making, and the level of importance attributed towards choosing between household heating and cooking technologies.

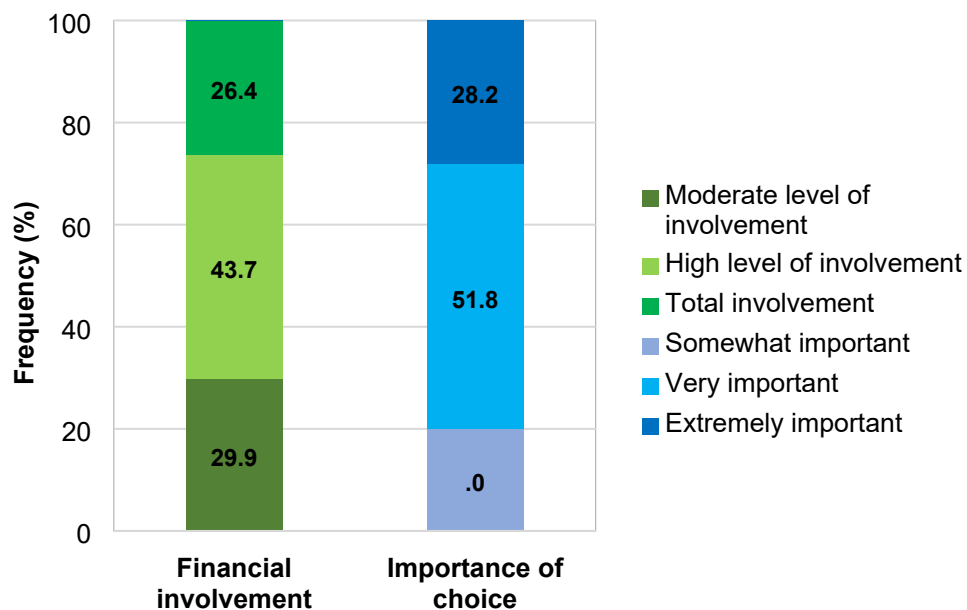

**Fig. S2. Financial involvement in appliance purchase and choice perceptions across sample.**

#### 4 Supplementary Note 4: Statistical tests for validating sample size specifications

Fig. S3a and Fig. S3b provide results on sample size requirements for testing effect sizes. We used G\*Power software to verify the parameters. Since our sample was relatively large ( $N = 1845$ ), it was suitable for PLS-SEM, however, we checked the results from G\*Power to clarify the reliability of (small) effect sizes, as described in Section 2.1

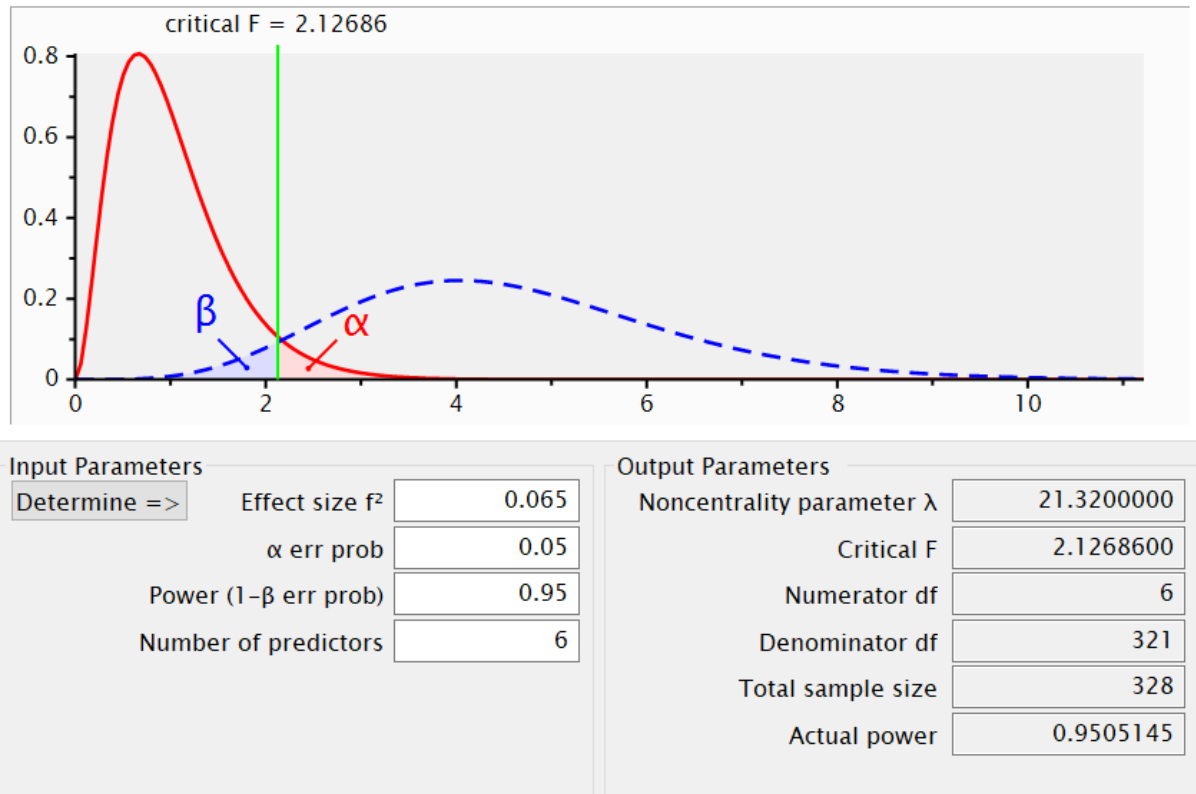

Fig. S3a. Power test to determine the minimum sample size for an effect size of 0.02 at 95% significance.

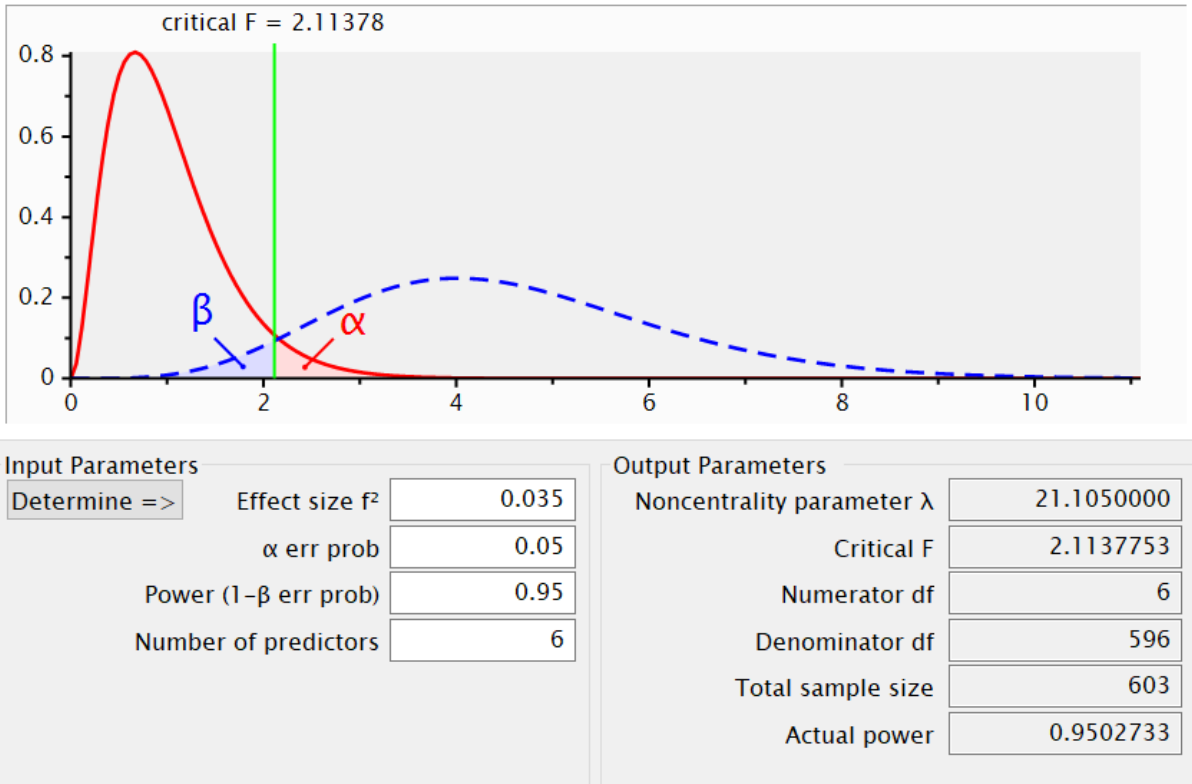

**Fig. S3b. Power test to determine the minimum sample size for an effect size of 0.02 at 95% significance.**

## 5 Supplementary Note 5: Common method bias

Table S4 tests each indicator for common method bias (CMB) across the full sample, which was ruled out by the results. The ranges for CMB held consistent across the sub-samples.

**Table S4. Harman single factor test for common method bias.**

| <b>Total Variance Explained</b> |                            |                      |                     |                                            |                      |                     |
|---------------------------------|----------------------------|----------------------|---------------------|--------------------------------------------|----------------------|---------------------|
| <b>Component</b>                | <b>Initial Eigenvalues</b> |                      |                     | <b>Extraction Sums of Squared Loadings</b> |                      |                     |
|                                 | <b>Total</b>               | <b>% of Variance</b> | <b>Cumulative %</b> | <b>Total</b>                               | <b>% of Variance</b> | <b>Cumulative %</b> |
| 1                               | 8.519                      | 29.376               | 29.376              | 8.519                                      | <b>29.376</b>        | <b>29.376</b>       |
| 2                               | 2.868                      | 9.89                 | 39.265              |                                            |                      |                     |
| 3                               | 2.322                      | 8.006                | 47.272              |                                            |                      |                     |
| 4                               | 2.05                       | 7.069                | 54.341              |                                            |                      |                     |
| 5                               | 1.627                      | 5.611                | 59.952              |                                            |                      |                     |
| 6                               | 1.58                       | 5.447                | 65.399              |                                            |                      |                     |
| 7                               | 0.944                      | 3.257                | 68.656              |                                            |                      |                     |
| 8                               | 0.911                      | 3.143                | 71.799              |                                            |                      |                     |
| 9                               | 0.784                      | 2.703                | 74.501              |                                            |                      |                     |
| 10                              | 0.721                      | 2.488                | 76.989              |                                            |                      |                     |
| 11                              | 0.612                      | 2.109                | 79.099              |                                            |                      |                     |
| 12                              | 0.556                      | 1.918                | 81.017              |                                            |                      |                     |
| 13                              | 0.501                      | 1.726                | 82.743              |                                            |                      |                     |
| 14                              | 0.472                      | 1.626                | 84.369              |                                            |                      |                     |
| 15                              | 0.435                      | 1.502                | 85.871              |                                            |                      |                     |
| 16                              | 0.424                      | 1.462                | 87.333              |                                            |                      |                     |
| 17                              | 0.414                      | 1.426                | 88.759              |                                            |                      |                     |
| 18                              | 0.372                      | 1.281                | 90.041              |                                            |                      |                     |
| 19                              | 0.358                      | 1.233                | 91.274              |                                            |                      |                     |
| 20                              | 0.339                      | 1.168                | 92.443              |                                            |                      |                     |
| 21                              | 0.317                      | 1.094                | 93.537              |                                            |                      |                     |
| 22                              | 0.307                      | 1.057                | 94.594              |                                            |                      |                     |
| 23                              | 0.293                      | 1.01                 | 95.604              |                                            |                      |                     |
| 24                              | 0.285                      | 0.984                | 96.587              |                                            |                      |                     |
| 25                              | 0.24                       | 0.827                | 97.414              |                                            |                      |                     |
| 26                              | 0.218                      | 0.75                 | 98.165              |                                            |                      |                     |
| 27                              | 0.196                      | 0.678                | 98.842              |                                            |                      |                     |
| 28                              | 0.19                       | 0.654                | 99.496              |                                            |                      |                     |
| 29                              | 0.146                      | 0.504                | 100                 |                                            |                      |                     |

**Extraction Method: Principal Component Analysis.**

## 6 Supplementary Note 6: Skewness and kurtosis

Table S5 reports the skewness and kurtosis for each indicator to verify the suitability of PLS-SEM, as discussed in Section 2.1.

**Table S5. Results for skewness and kurtosis.**

|             | BLG (N = 677) |          | MEG (N = 458) |          | VEG (N = 331) |          | FSG (N = 379) |          |
|-------------|---------------|----------|---------------|----------|---------------|----------|---------------|----------|
|             | Kurtosis      | Skewness | Kurtosis      | Skewness | Kurtosis      | Skewness | Kurtosis      | Skewness |
| <b>SP1</b>  | -0.127        | -0.072   | -0.173        | -0.189   | -0.266        | -0.423   | -0.013        | -0.113   |
| <b>SP2</b>  | -0.147        | -0.126   | -0.262        | -0.212   | -0.016        | -0.605   | 0.080         | -0.098   |
| <b>SP3</b>  | -0.053        | -0.055   | -0.286        | -0.161   | -0.298        | -0.515   | -0.033        | -0.184   |
| <b>SP4</b>  | -0.165        | -0.016   | -0.373        | -0.098   | -0.310        | -0.597   | -0.064        | -0.191   |
| <b>SP5</b>  | -0.026        | -0.141   | -0.303        | -0.296   | -0.002        | -0.590   | 0.500         | -0.350   |
| <b>BLR1</b> | -0.211        | -0.356   | -0.139        | -0.530   | 0.522         | -0.967   | -0.373        | -0.496   |
| <b>BLR2</b> | 0.513         | -1.063   | 1.379         | -1.333   | 1.961         | -1.455   | 0.418         | -1.098   |
| <b>BLR3</b> | -0.384        | -0.272   | -0.428        | -0.314   | -0.305        | -0.649   | -0.530        | -0.436   |
| <b>BLR4</b> | 0.076         | -0.796   | 0.169         | -0.840   | 0.905         | -1.195   | 0.011         | -0.883   |
| <b>HOB1</b> | -0.007        | -0.539   | 0.114         | -0.656   | 0.445         | -0.875   | -0.366        | -0.343   |
| <b>HOB2</b> | 0.177         | -0.288   | -0.135        | -0.372   | 0.020         | -0.580   | 0.095         | -0.282   |
| <b>HOB3</b> | -0.210        | -0.289   | -0.329        | -0.416   | -0.079        | -0.614   | -0.287        | -0.157   |
| <b>HOB4</b> | 0.040         | -0.424   | 0.157         | -0.606   | 0.109         | -0.613   | -0.248        | -0.360   |
| <b>FP1</b>  | 1.147         | -1.233   | 0.449         | -0.892   | -0.070        | -0.727   | 0.217         | -0.883   |
| <b>FP2</b>  | 1.171         | -1.173   | 0.254         | -0.709   | 0.035         | -0.653   | -0.112        | -0.692   |
| <b>FP3</b>  | -1.053        | -0.034   | -0.904        | 0.088    | -0.919        | -0.131   | -0.905        | 0.061    |
| <b>PSC1</b> | -0.203        | 0.294    | -0.418        | 0.362    | -0.826        | 0.371    | -0.430        | 0.153    |
| <b>PSC2</b> | -0.297        | 0.169    | -0.404        | 0.099    | -0.801        | 0.094    | -0.569        | 0.011    |
| <b>PP1</b>  | -0.017        | 0.014    | -0.008        | -0.324   | -0.682        | -0.405   | 0.258         | -0.178   |
| <b>PP2</b>  | -0.391        | -0.041   | -0.504        | -0.339   | 0.245         | -0.761   | -0.119        | -0.277   |
| <b>PP3</b>  | -0.611        | -0.190   | -0.349        | -0.583   | 1.512         | -1.207   | -0.145        | -0.356   |
| <b>PP4</b>  | 0.316         | -0.109   | 0.276         | -0.301   | 0.293         | -0.581   | 0.380         | 0.124    |
| <b>PP5</b>  | 0.050         | -0.028   | 0.294         | -0.174   | -0.099        | -0.388   | 0.498         | 0.126    |
| <b>PAP1</b> | -0.131        | 0.190    | -0.418        | 0.146    | -0.324        | -0.245   | -0.154        | -0.094   |

|             |        |        |        |        |        |        |        |        |
|-------------|--------|--------|--------|--------|--------|--------|--------|--------|
| <b>PAP2</b> | -0.149 | 0.339  | -0.405 | 0.187  | -0.493 | -0.217 | -0.167 | 0.060  |
| <b>PAP3</b> | -0.028 | 0.346  | -0.473 | 0.224  | -0.653 | -0.220 | -0.388 | 0.104  |
| <b>PAP4</b> | 0.054  | -0.307 | 0.177  | -0.430 | 1.240  | -0.893 | 0.128  | -0.472 |
| <b>PAP5</b> | -0.091 | -0.358 | 0.252  | -0.445 | 1.027  | -0.937 | 0.106  | -0.459 |
| <b>PAP6</b> | 0.020  | -0.512 | -0.048 | -0.568 | 0.198  | -0.761 | -0.016 | -0.408 |

---



## **7 Supplementary Note 7: Limitations of the Kruskal-Wallis H test**

The Kruskal-Wallis (K-W) H test can be used to support behavioural and social science research<sup>50</sup> by identifying group-specific differences when the samples are independent,<sup>51</sup> as is the case in this study. For example, Vibrans et al.<sup>52</sup> applied the K-W test when examining heterogeneity among potential solar PV adopters in Germany, as a complementary method to PLS-MGA. Nevertheless, non-parametric tests such as K-W are not without their limitations<sup>50,53</sup> such as potentially lower statistical power.<sup>54</sup> Furthermore, post-hoc tests are required to determine where statistically significant differences are detected<sup>50</sup> and to estimate effect sizes, rendering the K-W test as a means for supporting descriptive research and preliminary hypothesis testing.<sup>54</sup> In response, some researchers have proposed modified versions of the K-W test to increase robustness and statistical accuracy.<sup>53</sup>

## 8 Supplementary Note 8: Ceiling line results from NCA

Table S6 compares the ceiling line effect size for the CE-FDH and CR-FDH, by construct and consumer sub-group. The results are robust for the BLG and MEG, which suggests using either ceiling line may be appropriate since there is negligible influence on the results. For the FSG, the CR-FDH leads to a decrease of 0.032 on average across the three constructs. However, this deflation does not alter the results dramatically, since each effect size remains small. Finally, for the VEG, effect sizes also remain small in either case. However, the CR-FDH deviates significantly from the CE-FDH in directionality for technology perceptions (TP) and production perceptions (PP), while safety perceptions (SP) is stable. From PLS-SEM, it was established that PP has a more significant effect on adoption potential than TP, which would be reversed when applying the CR-FDH. While such intricacies warrant further attention and interrogation in future analyses, in the current study the CE-FDH is applied following the presented comparison.

**Table S6. Ceiling line effect size overview**

| Construct              | Ceiling envelopment free disposal hull (CE-FDH)                | Ceiling regression free disposal hull (CR-FDH) | Difference    |
|------------------------|----------------------------------------------------------------|------------------------------------------------|---------------|
|                        | <b>Baseline Group</b>                                          |                                                |               |
| Safety Perceptions     | 0.182                                                          | 0.180                                          | -0.002        |
| Technology Perceptions | 0.212                                                          | 0.219                                          | +0.007        |
| Production Perceptions | 0.158                                                          | 0.154                                          | -0.004        |
|                        | <b>Moderately technology and environmentally Engaged Group</b> |                                                |               |
| Safety Perceptions     | 0.149                                                          | 0.152                                          | +0.003        |
| Technology Perceptions | 0.150                                                          | 0.151                                          | +0.001        |
| Production Perceptions | 0.159                                                          | 0.167                                          | +0.008        |
|                        | <b>Very technology and environmentally Engaged Group</b>       |                                                |               |
| Safety Perceptions     | 0.149                                                          | 0.148                                          | -0.001        |
| Technology Perceptions | <b>0.163</b>                                                   | <b>0.235</b>                                   | <b>+0.072</b> |
| Production Perceptions | <b>0.259</b>                                                   | <b>0.214</b>                                   | <b>-0.045</b> |
|                        | <b>Fuel Stressed Group</b>                                     |                                                |               |
| Safety Perceptions     | 0.192                                                          | 0.171                                          | -0.021        |
| Technology Perceptions | 0.274                                                          | 0.235                                          | -0.039        |
| Production Perceptions | 0.268                                                          | 0.230                                          | -0.038        |

## 9 Supplementary Note 9: Segmentation-based methods

PLS-MGA functions by testing whether statistically significant differences exist between sub-groups, which the researcher identifies *a priori* during the recruitment stage (i.e. BLG, MEG, VEG, FSG);<sup>55,56</sup> as distinct from a *posteriori* approach wherein the research tests for unobserved heterogeneity within the data to identify the plausibility of different segments or 'clusters'.<sup>57,58</sup> When the research design involves no prespecified targeting of sub-groups, the analyst can instead examine whether the sample data is defined by unobserved heterogeneity, which is motivated "to avert validity threats."<sup>58</sup>

SmartPLS 4.1 supports techniques such as finite mixture partial least squares (FIMIX-PLS)<sup>59</sup> and PLS prediction-oriented segmentation (PLS-POS),<sup>58</sup> as respective latent class and distance-based segmentation methods to uncover unobserved heterogeneity in the structural model. Specifically, FIMIX-PLS uncovers heterogeneity by estimating the probability of segment membership for each observation and simultaneously estimating the path coefficient for all segments.<sup>59,60</sup> PLS-POS follows a clustering approach with a deterministic assignment of observations to groups and uses a distance measure for the reassignment of observations. As such, the method has no distributional assumptions.<sup>58</sup>

Although latent class modelling affords opportunities to identify consumer segments with similar attitudes and perceptions *a posteriori*,<sup>59,61</sup> the method is also prone to limitations in terms of reliably estimating the number of clusters and defining their boundaries (i.e. lack of interpretability regarding the cluster descriptors)<sup>62</sup>. Other methodological challenges may include a high Type I error rate, low statistical power, and limitations in examining higher-order interactions.<sup>63</sup>

For example, Kandiah et al.<sup>64</sup> employed agent-based modelling to show that public opinion dynamics towards water reclamation differ according to membership in opinion clusters (i.e. optimistic, disengaged, alarmed, or conflicted consumers). However, the approach relied on clustering methods with known limitations,<sup>63,65</sup> which reflected the additional identification of sub-groups within the main consumer segments (i.e. *adopter* as a subset of *optimistic*, and *resistor* as a subset of *alarmed*).<sup>62</sup>

Specifically, Ward's hierarchical clustering method was used to create four clusters, wherein the random start point for the iterative clustering process biases the cluster

membership of the first individual analysed, which motivated the subsequent use of K-means cluster analysis to create a second clustering solution on the cluster averages from the first step. Additionally, multiple imputation was required since 158 respondents could not be sorted into a cluster directly due to missing values. Nevertheless, latent class analysis – defined in the literature as “a probabilistic modelling algorithm that allows clustering of data and statistical inference”<sup>66,67</sup> – may prove useful for exploratory research when the goal is “to determine groups that are maximally different by some criterion.”<sup>68</sup>

In summary, PLS-MGA should be applied when the analysis is of a confirmatory nature following *a priori* identification of sub-groups, whereas other methods should be applied to groups detected via cluster analysis of similar techniques.<sup>69</sup> Moreover, researchers should approach these methods with caution and due diligence, since using clustering techniques as a subsequent input to run PLS-MGA is conceptually flawed.<sup>70</sup> Such a sequencing would discount the path model relationships specified prior to the analysis, which are the very relationships likely to explain potential group differences.<sup>70</sup>

It follows that traditional clustering techniques are subject to conceptual drawbacks, rendering these methods ill-suited for identifying heterogeneity in the relationships between latent variables (i.e. segment-specific differences in structural equation models).<sup>71</sup> In technical terms, “the identifying assumption of latent class models is local dependence,” therefore, “data dependencies that fail to be predicted by the local dependence model are absorbed as additional classes,” which “may bias model parameters of interest as well as posterior classifications.”<sup>68</sup> These constraints are also discussed by Loo and colleagues.<sup>72</sup>

## 10 Supplementary Note 10: Summary of studies with a multigroup research focus.

**Table S7. Seminal technology acceptance studies employing multigroup analysis or moderation analysis.**

| <b>Author and year of study</b>             | <b>Empirical focus and location of study</b>                                                                                                                                                                | <b>Research method and sample size</b>                                                             | <b>Theoretical foundation(s)</b>                                                             | <b>Application of MGA/moderation analysis to structural equation modelling</b>                                                                                                                                                                                      |
|---------------------------------------------|-------------------------------------------------------------------------------------------------------------------------------------------------------------------------------------------------------------|----------------------------------------------------------------------------------------------------|----------------------------------------------------------------------------------------------|---------------------------------------------------------------------------------------------------------------------------------------------------------------------------------------------------------------------------------------------------------------------|
| Lin <sup>73</sup><br>2011                   | <ul style="list-style-type: none"> <li>Examines the antecedents of attitude and behavioural intention towards adopting (or continuing to use) mobile banking</li> <li>Taiwan</li> </ul>                     | <ul style="list-style-type: none"> <li>Paper-based questionnaire</li> <li>N = 368</li> </ul>       | <ul style="list-style-type: none"> <li>Dol theory and knowledge-based trust model</li> </ul> | <ul style="list-style-type: none"> <li>Group 1 = Potential customers (N = 177)</li> <li>Group 2 = Repeat customers (N = 191)</li> </ul>                                                                                                                             |
| Thakur and Srivastava <sup>74</sup><br>2014 | <ul style="list-style-type: none"> <li>Examines the antecedents of usage intention for mobile payments</li> <li>India</li> </ul>                                                                            | <ul style="list-style-type: none"> <li>Paper-based questionnaire</li> <li>N = 774</li> </ul>       | <ul style="list-style-type: none"> <li>TAM</li> <li>UTAUT</li> </ul>                         | <ul style="list-style-type: none"> <li>Group 1: Users</li> <li>Group 2: Non-users<sup>a</sup></li> </ul>                                                                                                                                                            |
| Leong et al. <sup>75</sup><br>2013          | <ul style="list-style-type: none"> <li>Examines the determinants of mobile credit card adoption</li> <li>Malaysia</li> </ul>                                                                                | <ul style="list-style-type: none"> <li>Self-administered questionnaire</li> <li>N = 262</li> </ul> | <ul style="list-style-type: none"> <li>Extended TAM</li> </ul>                               | <ul style="list-style-type: none"> <li>Gender (male, female)</li> <li>Age (younger, older)</li> <li>Experience (low, high)</li> <li>Usage (low, high)</li> </ul>                                                                                                    |
| Farooq et al. <sup>76</sup><br>2020         | <ul style="list-style-type: none"> <li>Investigates the impact of online information on the individual-level intention to voluntarily self-isolate during the COVID-19 pandemic</li> <li>Finland</li> </ul> | <ul style="list-style-type: none"> <li>Online survey</li> <li>N = 225</li> </ul>                   | <ul style="list-style-type: none"> <li>Protection motivation theory<sup>b</sup></li> </ul>   | <ul style="list-style-type: none"> <li>Group 1a: Living alone (N = 122)</li> <li>Group 1b: Living with others (N = 109)</li> <li>Group 2a: Social media as primary information channel (N = 119)</li> <li>Group 2b: Other information channels (N = 106)</li> </ul> |
| Tarhini et al. <sup>77</sup><br>2017        | <ul style="list-style-type: none"> <li>Examines the effects of individual-level culture on the adoption and acceptance of e-learning tools by students</li> <li>Lebanon</li> </ul>                          | <ul style="list-style-type: none"> <li>Online survey</li> <li>N = 569</li> </ul>                   | <ul style="list-style-type: none"> <li>Extended TAM</li> </ul>                               | <ul style="list-style-type: none"> <li>Power distance<sup>c</sup></li> <li>Cultural values (masculinity vs femininity)</li> <li>Uncertainty avoidance<sup>d</sup></li> <li>Individualism/collectivism</li> </ul>                                                    |

|                                                  |                                                                                                                                                                                                       |                                                                                                                      |                                                                                                                                   |                                                                                                                                              |
|--------------------------------------------------|-------------------------------------------------------------------------------------------------------------------------------------------------------------------------------------------------------|----------------------------------------------------------------------------------------------------------------------|-----------------------------------------------------------------------------------------------------------------------------------|----------------------------------------------------------------------------------------------------------------------------------------------|
| Tan et al. <sup>78</sup><br>2014                 | <ul style="list-style-type: none"> <li>Investigates the factors influencing mobile credit card adoption</li> <li>Malaysia</li> </ul>                                                                  | <ul style="list-style-type: none"> <li>Self-administered questionnaire</li> <li>N = 156</li> </ul>                   | <ul style="list-style-type: none"> <li>Extended TAM</li> </ul>                                                                    | <ul style="list-style-type: none"> <li>Gender (male, female)</li> </ul>                                                                      |
| Barbarossa & De Pelsmacker <sup>79</sup><br>2016 | <ul style="list-style-type: none"> <li>Examines the drivers and barriers towards purchasing eco-friendly products</li> <li>Italy</li> </ul>                                                           | <ul style="list-style-type: none"> <li>Self-administered questionnaire</li> <li>N = 926</li> </ul>                   | <ul style="list-style-type: none"> <li>Social dilemma theory</li> <li>Psychological egoism theory</li> </ul>                      | <ul style="list-style-type: none"> <li>Group 1: Green consumers (N = 453)</li> <li>Group 2: Non-green consumers (N = 473)</li> </ul>         |
| Krasnova et al. <sup>80</sup><br>2012            | <ul style="list-style-type: none"> <li>Examines the role of culture in individual self-disclosure decisions among users of social networking sites</li> <li>United States</li> <li>Germany</li> </ul> | <ul style="list-style-type: none"> <li>Online survey</li> <li>N = 375</li> </ul>                                     | <ul style="list-style-type: none"> <li>Privacy calculus perspective<sup>e</sup></li> </ul>                                        | <ul style="list-style-type: none"> <li>Group 1: American users (N = 237)</li> <li>Group 2: German users (N = 138)<sup>f</sup></li> </ul>     |
| Kong et al. <sup>81</sup><br>2013                | <ul style="list-style-type: none"> <li>Examines effects of loneliness and self-esteem for the relationship between social support and life satisfaction among college students</li> </ul>             | <ul style="list-style-type: none"> <li>Self-administered questionnaire</li> <li>N = 389</li> </ul>                   | <ul style="list-style-type: none"> <li>Attachment and stress theory<sup>g</sup></li> </ul>                                        | <ul style="list-style-type: none"> <li>Group 1: Female students (N = 260)</li> <li>Group 2: Male students (N = 129)</li> </ul>               |
| Pappas et al. <sup>82</sup>                      | <ul style="list-style-type: none"> <li>Examines the moderating role of experience on repurchase intention among online shoppers</li> <li>Greece</li> </ul>                                            | <ul style="list-style-type: none"> <li>Online survey and self-administered questionnaire</li> <li>N = 393</li> </ul> | <ul style="list-style-type: none"> <li>UTAUT</li> <li>Expectation confirmation theory</li> <li>Social cognitive theory</li> </ul> | <ul style="list-style-type: none"> <li>Group 1: Low-experienced customers (N = 214)</li> <li>High-experienced customers (N = 179)</li> </ul> |

<sup>a</sup> Sample size not provided.

<sup>b</sup> The theory examines motivational reasons for adoption protective measures and divides the causes into threat appraisal and coping appraisal.

<sup>c</sup> The extent to which individuals expect and accept differences in power between different people.

<sup>d</sup> The extent to which ambiguities and uncertainties are tolerated.

<sup>e</sup> Rooted in social exchange theory.

<sup>f</sup> Users were national of each country. In the case of Germany, 99 foreign respondents were excluded from the sample.

<sup>g</sup> Rooted in theories related to attachment and stress.

## **11 Supplementary Note 11: Evidence on public perceptions of hydrogen from Australia**

In 2021, Martin et al.<sup>25</sup> found no significant differences in levels of hydrogen support between respondents identifying with one of Australia's three national parties (Liberal/National, Labour, and Greens), although support proved lower among respondents corresponding to 'other' political party preferences (i.e. Not Liberal/National, Labour or Greens). The authors concluded that the hydrogen industry should therefore garner bi-partisan public support.<sup>25</sup>

However, no speculation was made as to the potential relevance of an association between apolitical beliefs and lower support for the national hydrogen economy or wider energy transition. In terms of gender, males proved significantly more supportive of hydrogen, although this disparity closed considerably following information provision.<sup>25</sup> This result may infer a more cautious or sceptical attitude among female respondents in absence of information, whereas males have a stronger predisposition to supporting emerging hydrogen energy technologies.<sup>32,42,83</sup>

### **Heterogenous energy preferences in the United Kingdom**

Roddis and colleagues<sup>84</sup> found that the Southwest and Eastern England had higher levels of support for most energy types, whereas Scotland and London presented consistently lower approval rates, which reflects an approximate North-South divide. Nevertheless, it was concluded that age and concern for climate change were stronger predictors of public acceptance than regional location.<sup>84</sup> Notably, divergence was also observed between urban and rural locations for specific technologies, while citizens most and least directly exposed to energy technologies<sup>i</sup> (i.e. Scotland and London) had the lowest support levels.<sup>84</sup> The contribution of Roddis et al.<sup>84</sup> reinforces the need to recognise that public perceptions of energy technologies may be characterised by different degrees of consumer heterogeneity.

## 12 Supplementary Note 12: The role of perceived benefits in technology acceptance models

Perceived benefits plays a prominent role in technology acceptance models, typically acting as an antecedent of attitude toward to use, as conceptualised within the TAM vis-à-vis perceived usefulness.<sup>85</sup> Focusing on the hospitality sector, Wang and Qualls<sup>86</sup> adapted the TAM to examine the relationship between perceived ease of adoption, perceived benefits of adoption, and technology adoption behaviour, wherein perceived benefits also acted as a mediating construct. Lee<sup>87</sup> tested the effect of perceived benefits on both attitude ( $\beta = 0.24, p < 0.05$ ) and behavioural intention ( $\beta = 0.32, p < 0.05$ ) towards internet banking, reporting a stronger effect size for the latter. Notably, a recent meta-analysis showed that perceived benefits is the most significant predictor of residential PV adoption intention.<sup>88</sup>

However, at the latter stages of the innovation-decision process (i.e. implementation and confirmation), the focus may then shift from perceived benefits to a focus on 'benefits realised', as demonstrated by Daniel and Wilson<sup>89</sup> in the context of e-commerce adoption among small and medium-sized enterprises in the UK. Moreover, in the context of radio frequency identification adoption (RFID), Reyes et al.<sup>90</sup> showed that different stages of the innovation-decision process influence the level of perceived benefits (i.e. customer service, productivity, asset management, and communication) among supply chain professionals. A similar approach was applied by Jiménez-Martínez and Polo-Redondo<sup>91</sup> when examining how perceptions of benefits may change among Spanish administrations in the context of electronic data interchange. The authors made the case that benefits may be hard to perceive at first but become more tangible following adoption.<sup>91</sup> Consequently, increasing trialability of the technology is usually the most direct way to raise perceived benefits and adoption prospects.

As the literature has evolved, researchers have operationalised perceived benefits in several ways, reflecting both the importance and multi-faceted nature of the construct. For example, alongside perceived barriers ( $\beta = 0.272$ ), perceived benefits ( $\beta = 0.262$ ) had the strongest influence on willingness to participate in electronic bidding<sup>ii</sup> in the construction industry, but also moderated the relationship between perceived barriers and participation willingness ( $\beta = 0.535$ ).<sup>92</sup> In the context of technology-enhanced learning, Dubey and Sahu<sup>93</sup> operationalised perceived benefits as both a mediator



and moderator of the relationship between adoption intention and student satisfaction, thereby applying an outcome-orientated lens.

Kim et al.<sup>94</sup> supported the hypotheses that the relative benefits of mobile banking positively influence consumer trust ( $\beta = 0.30, p < 0.01$ ), in addition to directly predicting usage intention ( $\beta = 0.18, p < 0.01$ ), with an overall effect size of 0.28. Additionally, Laforet and Li<sup>95</sup> observed that understanding potential benefits is critical to mobile banking adoption. However, Gong et al.<sup>96</sup> showed that perceived benefits mediates the relationship between trust in online health consultation services and adoption intention. Park and colleagues<sup>97</sup> applied a similar approach when examining the interplay between perceived risk, benefit, and trust on consumer's intention to use mobile payment services in the Midwestern United States.

Critically, it should be noted that in many contexts, perceived benefits is understood in terms of 'relative advantage' vis-à-vis Rogers' seminal classification<sup>iii.98</sup>. For example, the study of Abou-Shouk and colleagues<sup>99</sup> focused on perceived benefits of e-commerce adoption among Egyptian travel agents, wherein relative advantage was characterised via three constructs composed of at least four indicators (i.e. 'essential benefits', N = 4; 'marketing and competition benefits', N = 5; and 'business internal efficiency benefit', N = 6). A more reductive approach may also prevail, as taken by Au and Enderwick<sup>100</sup> when defining 'perceived benefit' in terms of "the adopter's belief of the likelihood that the technology can improve the economic benefits of the organisation and/or of the person."

## **13 Supplementary Note 13: Kruskal-Wallis H Test results for adoption factors**

### **13.1 Safety Perceptions**

In terms of safety perceptions, the VEG expressed the most positive outlook ( $M = 6.59$ ), followed by the MEG ( $M = 5.87$ ), the FSG ( $M = 5.75$ ), and finally, the BLG ( $M = 5.55$ ). Notably, the VEG registered a more positive perception across all safety metrics compared to other sub-groups, which also held true when comparing the MEG to the BLG and FSG. Based on these patterns, technology and environmental engagement is positively correlated with confidence in hydrogen safety. A K-W test was performed after forming a composite score from the five safety indicators, which supported the presence of consumer heterogeneity:  $H(3, N = 1845) = 85.97, p < 0.001$ . The groups rank as follows (highest to lowest): VEG:  $Md = 1156$ ; MEG:  $Md = 923$ ; FSG:  $Md = 887$ ; BLG:  $Md = 829$ .

### **13.2 Technology Perceptions**

Regarding technological perceptions, the VEG attributed the strongest positive expectation to boiler performance ( $M = 7.54$ ), followed by the FSG ( $M = 7.10$ ), MEG ( $M = 6.99$ ) and BLG ( $M = 6.81$ ). The VEG also reflected the highest level of confidence in hydrogen cooking ( $M = 6.81$ ), followed by the MEG ( $M = 6.22$ ), the FSG ( $M = 6.15$ ), and the BLG ( $M = 5.94$ ). Overall, the VEG emerges as the consumer segment with highest level of expectancy regarding the relative advantage of hydrogen appliances, while the BLG is the least conservative sub-group when compared at the descriptive level. Consequently, a K-W test detected group-specific differences regarding perceptions of boiler performance (composite score):  $H(3, N = 1845) = 31.57, p < 0.001$ . The groups rank as follows (highest to lowest): VEG:  $Md = 1054$ ; FSG:  $Md = 939$ ; MEG:  $Md = 916$ ; BLG:  $Md = 855$ . A comparable result is likewise reported for hob performance (composite score):  $H(3, N = 1845) = 49.12, p < 0.001$ . The groups rank as follows (highest to lowest): VEG:  $Md = 1094$ ; MEG:  $Md = 932$ ; FSG:  $Md = 899$ ; BLG:  $Md = 846$ .

### **13.3 Financial Perceptions**

In terms of financial perceptions, the BLG held the most negative perspective or highest level of concern across all three metrics ( $M = 7.69$ ), followed by the MEG ( $M = 7.41$ ), FSG ( $M = 7.25$ ) and VEG ( $M = 7.21$ ). As a result, consumer heterogeneity was identified:  $H(3, N = 1845) = 29.93, p < 0.001$ . The groups rank as follows (least

negative to most negative financial perception): VEG:  $Md = 848$ ; FSG:  $Md = 862$ ; MEG:  $Md = 901$ ; BLG:  $Md = 1008$ . The expectation that hydrogen boilers would be significantly more expensive to purchase than natural gas boilers proved largest across the sample (FP1:  $M = 8.08$ ) and for all sub-groups. Nevertheless, respondents perceived the purchasing price of each appliance to be relatively comparable. For example, perceptions proved near equivalent in the case of the BLG: Boiler:  $M = 8.36$ ; Hob:  $M = 8.32$ . In line with previous findings,<sup>15</sup> there was less expectation across the sample that a switch to hydrogen would adversely impact energy bills FP3:  $M = 6.28$ ).

### **13.4 Perceived Socio-economic Costs**

At the macro-economic level, the FSG relayed the most negative outlook across both metrics (PSC1:  $M = 5.82$ ; PSC2:  $M = 6.12$ ). Consequently, the FSG represents the most concerned sub-group ( $M = 5.97$ ) in respect to perceived socio-economic impacts, followed by the BLG ( $M = 5.82$ ), VEG ( $M = 5.64$ ), and MEG ( $M = 5.52$ ). In view of the FSG expressing higher levels of socio-economic concern, group-specific differences were identified:  $H(3, N = 1845) = 10.540, p = 0.014$ . The groups rank as follows (least negative to most negative socio-economic perception): VEG:  $Md = 865$ ; MEG:  $Md = 888$ ; BLG:  $Md = 949$ ; FSG:  $Md = 967$ .

### **13.5 Production Perceptions**

Finally, regarding production perceptions, the VEG proved outright the most supportive consumer segment ( $M = 7.24$ ), followed by the MEG ( $M = 6.60$ ), FSG ( $M = 6.02$ ), and BLG ( $M = 5.93$ ). As a result, the data suggests technology and environmental engagement is positively associated with support for the twin-track approach. Moreover, in view of descriptive results for each production pathway, support is strongest for green hydrogen production.<sup>101</sup> The mean score for PP1 and PP2 (blue) = 6.17, while the mean score for PP3 and PP4 (green) = 6.86 across the sample. In this case, a substantial level of consumer heterogeneity is observed:  $H(3, N = 1845) = 207.36, p < 0.001$ . The groups rank as follows (highest to lowest): VEG:  $Md = 1241$ ; MEG:  $Md = 1019$ ; FSG:  $Md = 796$ ; BLG:  $Md = 774$ .

**Table S8. Summary of descriptive statistics for constructs predicting adoption potential.**

| Construct        | Baseline Group (BLG) | Moderately Engaged Group (MEG) | Very Engaged Group (VEG) | Fuel Stress Group (FSG) | Full sample |
|------------------|----------------------|--------------------------------|--------------------------|-------------------------|-------------|
| SP               | 5.55                 | 5.87                           | 6.59                     | 5.75                    | 5.86        |
| BLR              | 6.81                 | 6.99                           | 7.54                     | 7.10                    | 7.05        |
| HOB              | 5.94                 | 6.22                           | 6.81                     | 6.15                    | 6.21        |
| FP <sup>a</sup>  | 7.69                 | 7.41                           | 7.21                     | 7.25                    | 7.45        |
| PSC <sup>a</sup> | 5.82                 | 5.52                           | 5.64                     | 5.97                    | 5.74        |
| PP               | 5.93                 | 6.60                           | 7.24                     | 6.02                    | 6.35        |

<sup>a</sup> Values for FP and PSC are converted from a five-point Likert scale for comparative purposes.

### 13.6 Distribution of accepters and rejecters of hydrogen homes

Fig. S4 provides an alternative representation of the data presented in Section 6.1.1 (see Fig. 9) by adjusting the results to the sample size of each group. Therefore, 15.8% of respondents in the BLG corresponded to a position of outright rejection (i.e. 107/677), while 25.4% of respondents in the VEG could be considered outright ‘accepters’ of hydrogen homes (i.e. 84/331).

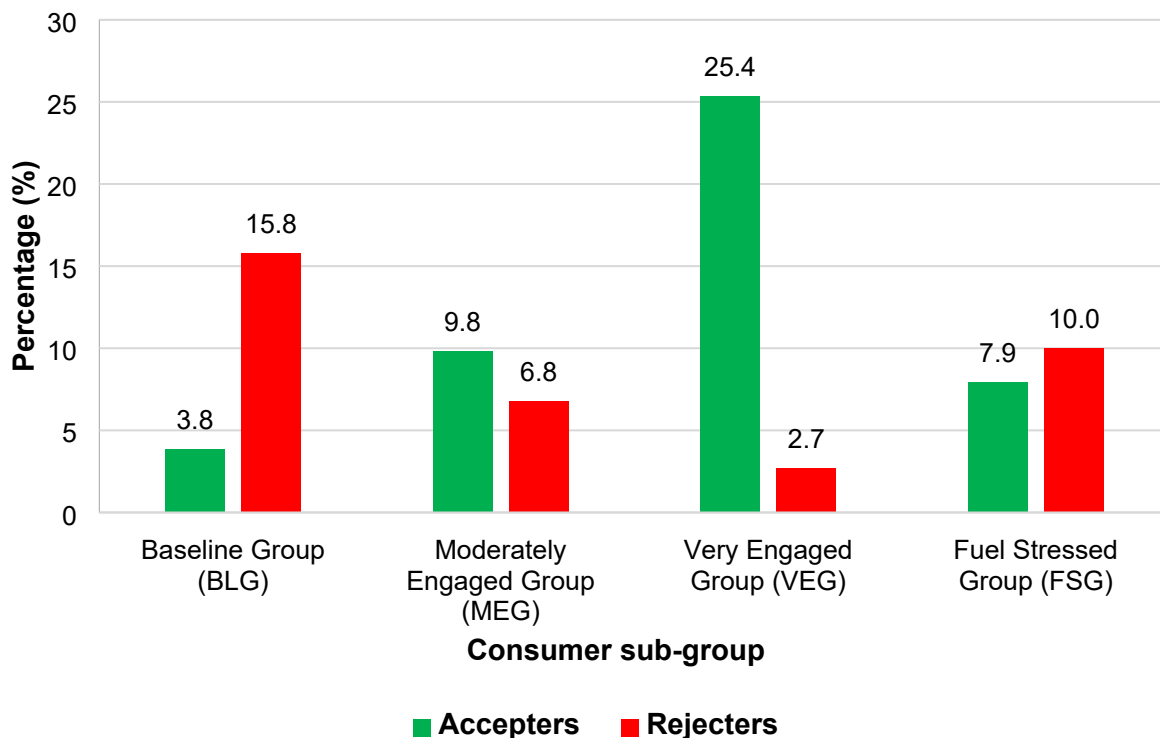

**Fig. S4. Breakdown of hydrogen acceptance and rejection by consumer sub-group relative to sample size.**

#### 14 Supplementary Note 14: Measurement model assessment

In the case of the BLG, all indicator loadings met the threshold value of 0.708, while one indicator loading failed to satisfy this threshold for the MEG (PP1 = 0.409). Regarding the VEG, three indicators fell marginally below the CA threshold: BLR2 = 0.682; FIN2 = 0.693; ADPT = 0.671. Additionally, and concurring with the result for the MEG, PP1 had a CA value of 0.578. Finally, the FSG reflected a similar pattern, reporting a value of 0.445 for PP1, in addition to 0.668 for PP5, while three other indicators failed to satisfy the recommended threshold: BL3 = 0.596; FP1 = 0.550; FP2 = 0.532. Table S9–S11 report the measurement model assessment for the remaining sub-groups, following the report for the BLG in the main analysis.

**Table S9a. Assessment of reliability, convergent validity, and multicollinearity for the Moderately Technology and Environmentally Engaged Group.**

| Construct                            | CA    | CR ( $\rho_A$ ) | CR ( $\rho_C$ ) | AVE   | VIF   |
|--------------------------------------|-------|-----------------|-----------------|-------|-------|
| Safety Perceptions (SP)              | 0.924 | 0.925           | 0.943           | 0.768 | 1.224 |
| Perceived Boiler Performance (BLR)*  | 0.765 | 0.768           | 0.850           | 0.588 | 1.657 |
| Perceived Hob Performance (HOB)*     | 0.861 | 0.864           | 0.906           | 0.706 | 1.657 |
| Technology Perceptions (TP)**        | 0.773 | 0.773           | 0.898           | 0.815 | 1.149 |
| Financial Perceptions (FP)           | 0.740 | 0.933           | 0.812           | 0.593 | 1.053 |
| Perceived Socio-economic Costs (PSC) | 0.678 | 0.686           | 0.861           | 0.756 | 1.200 |
| Production Perceptions (PP)          | 0.762 | 0.808           | 0.836           | 0.516 | 1.253 |
| Perceived Adoption Potential (PAP)   | 0.832 | 0.842           | 0.870           | 0.528 | n/a   |

\*\* Higher-order construct

\* Lower order constructs

**Table S9b. Fornell Larcker results for the Moderately Technology and Environmentally Engaged Group.**

|            | BLR    | FP     | HOB    | PAP    | PSC    | PP    | SP    |
|------------|--------|--------|--------|--------|--------|-------|-------|
| <b>BLR</b> | 0.767  |        |        |        |        |       |       |
| <b>FP</b>  | -0.160 | 0.770  |        |        |        |       |       |
| <b>HOB</b> | 0.630  | -0.078 | 0.840  |        |        |       |       |
| <b>PAP</b> | 0.382  | -0.269 | 0.376  | 0.727  |        |       |       |
| <b>PSC</b> | -0.113 | 0.164  | -0.133 | -0.465 | 0.869  |       |       |
| <b>PP</b>  | 0.138  | -0.095 | 0.160  | 0.494  | -0.382 | 0.719 |       |
| <b>SP</b>  | 0.270  | -0.162 | 0.341  | 0.526  | -0.159 | 0.290 | 0.876 |

**Table S9c. HTMT results for the Moderately Technology and Environmentally Engaged Group.**

|            | <b>BLR</b> | <b>FP</b> | <b>HOB</b> | <b>PAP</b> | <b>PSC</b> | <b>PP</b> | <b>SP</b> |
|------------|------------|-----------|------------|------------|------------|-----------|-----------|
| <b>BLR</b> |            |           |            |            |            |           |           |
| <b>FP</b>  | 0.182      |           |            |            |            |           |           |
| <b>HOB</b> | 0.773      | 0.107     |            |            |            |           |           |
| <b>PAP</b> | 0.412      | 0.270     | 0.373      |            |            |           |           |
| <b>PSC</b> | 0.181      | 0.180     | 0.169      | 0.609      |            |           |           |
| <b>PP</b>  | 0.214      | 0.106     | 0.206      | 0.560      | 0.498      |           |           |
| <b>SP</b>  | 0.320      | 0.160     | 0.382      | 0.551      | 0.194      | 0.372     |           |

**Table S10a. Assessment of reliability, convergent validity, and multicollinearity for the Very Technology and Environmentally Engaged Group.**

| <b>Construct</b>                     | <b>CA</b> | <b>CR (<math>\rho_A</math>)</b> | <b>CR (<math>\rho_C</math>)</b> | <b>AVE</b> | <b>VIF</b> |
|--------------------------------------|-----------|---------------------------------|---------------------------------|------------|------------|
| Safety Perceptions (SP)              | 0.929     | 0.931                           | 0.946                           | 0.779      | 1.568      |
| Perceived Boiler Performance (BLR)*  | 0.735     | 0.739                           | 0.834                           | 0.558      | 1.843      |
| Perceived Hob Performance (HOB)*     | 0.865     | 0.865                           | 0.908                           | 0.712      | 1.843      |
| Technology Perceptions (TP)**        | 0.803     | 0.804                           | 0.911                           | 0.836      | 1.417      |
| Financial Perceptions (FP)           | 0.684     | 0.798                           | 0.796                           | 0.567      | 1.054      |
| Perceived Socio-economic Costs (PSC) | 0.785     | 0.833                           | 0.901                           | 0.820      | 1.063      |
| Production Perceptions (PP)          | 0.754     | 0.765                           | 0.834                           | 0.504      | 1.253      |
| Perceived Adoption Potential (PAP)   | 0.830     | 0.838                           | 0.873                           | 0.534      | n/a        |

\*\* Higher-order construct

\* Lower order constructs

**Table S10b. Fornell Larcker results for the Very Technology and Environmentally Engaged Group.**

|            | <b>BLR</b> | <b>FP</b> | <b>HOB</b> | <b>PAP</b> | <b>PSC</b> | <b>PP</b> | <b>SP</b> |
|------------|------------|-----------|------------|------------|------------|-----------|-----------|
| <b>BLR</b> | 0.747      |           |            |            |            |           |           |
| <b>FP</b>  | -0.109     | 0.753     |            |            |            |           |           |
| <b>HOB</b> | 0.676      | -0.096    | 0.844      |            |            |           |           |
| <b>PAP</b> | 0.417      | -0.230    | 0.471      | 0.731      |            |           |           |
| <b>PSC</b> | -0.062     | 0.059     | -0.060     | -0.205     | 0.906      |           |           |
| <b>PP</b>  | 0.243      | -0.165    | 0.304      | 0.591      | -0.177     | 0.710     |           |
| <b>SP</b>  | 0.411      | -0.199    | 0.537      | 0.573      | -0.055     | 0.384     | 0.883     |

**Table S10c. HTMT results for the Very Technology and Environmentally Engaged Group.**

|            | BLR   | FP    | HOB   | PAP   | PSC   | PP    | SP |
|------------|-------|-------|-------|-------|-------|-------|----|
| <b>BLR</b> |       |       |       |       |       |       |    |
| <b>FP</b>  | 0.205 |       |       |       |       |       |    |
| <b>HOB</b> | 0.846 | 0.134 |       |       |       |       |    |
| <b>PAP</b> | 0.497 | 0.257 | 0.500 |       |       |       |    |
| <b>PSC</b> | 0.214 | 0.281 | 0.102 | 0.250 |       |       |    |
| <b>PP</b>  | 0.333 | 0.265 | 0.378 | 0.735 | 0.277 |       |    |
| <b>SP</b>  | 0.495 | 0.234 | 0.598 | 0.611 | 0.064 | 0.475 |    |

**Table S11a. Assessment of reliability, convergent validity, and multicollinearity for the Fuel Stressed Group.**

| Construct                            | CA    | CR ( $\rho_A$ ) | CR ( $\rho_C$ ) | AVE   | VIF   |
|--------------------------------------|-------|-----------------|-----------------|-------|-------|
| Safety Perceptions (SP)              | 0.892 | 0.894           | 0.921           | 0.699 | 1.224 |
| Perceived Boiler Performance (BLR)*  | 0.673 | 0.685           | 0.803           | 0.508 | 1.657 |
| Perceived Hob Performance (HOB)*     | 0.836 | 0.837           | 0.891           | 0.671 | 1.657 |
| Technology Perceptions (TP)**        | 0.744 | 0.744           | 0.886           | 0.796 | 1.149 |
| Financial Perceptions (FP)           | 0.703 | 0.717           | 0.733           | 0.498 | 1.053 |
| Perceived Socio-economic Costs (PSC) | 0.749 | 0.758           | 0.888           | 0.799 | 1.200 |
| Production Perceptions (PP)          | 0.772 | 0.825           | 0.842           | 0.527 | 1.253 |
| Perceived Adoption Potential (ADPT)  | 0.836 | 0.843           | 0.877           | 0.543 | n/a   |

\*\* Higher-order construct

\* Lower order constructs

**Table S11b. Fornell Larcker results for the Fuel Stressed Group.**

|            | BLR    | FP     | HOB    | PAP    | PSC    | PP    | SP    |
|------------|--------|--------|--------|--------|--------|-------|-------|
| <b>BLR</b> | 0.713  |        |        |        |        |       |       |
| <b>FP</b>  | -0.170 | 0.706  |        |        |        |       |       |
| <b>HOB</b> | 0.592  | -0.127 | 0.819  |        |        |       |       |
| <b>PAP</b> | 0.422  | -0.295 | 0.425  | 0.737  |        |       |       |
| <b>PSC</b> | -0.267 | 0.297  | -0.253 | -0.402 | 0.894  |       |       |
| <b>PP</b>  | 0.248  | -0.116 | 0.256  | 0.472  | -0.262 | 0.726 |       |
| <b>SP</b>  | 0.369  | -0.154 | 0.394  | 0.499  | -0.153 | 0.301 | 0.836 |

**Table S11c. HTMT results for the Fuel Stressed Group.**

|            | BLR   | FP    | HOB   | PAP   | PSC   | PP    | SP |
|------------|-------|-------|-------|-------|-------|-------|----|
| <b>BLR</b> |       |       |       |       |       |       |    |
| <b>FP</b>  | 0.296 |       |       |       |       |       |    |
| <b>HOB</b> | 0.784 | 0.169 |       |       |       |       |    |
| <b>PAP</b> | 0.541 | 0.270 | 0.469 |       |       |       |    |
| <b>PSC</b> | 0.363 | 0.230 | 0.319 | 0.493 |       |       |    |
| <b>PP</b>  | 0.344 | 0.161 | 0.324 | 0.545 | 0.327 |       |    |
| <b>SP</b>  | 0.486 | 0.168 | 0.457 | 0.558 | 0.190 | 0.365 |    |

## 15 Supplementary Note 15: Measurement model assessment for higher-order construct

Fig. S5a–S5d present the PLS-SEM output for validating the higher-order construct, Technology Perceptions (TP) for each consumer sub-group, following the guidelines presented by Sarstedt and colleagues.<sup>102</sup> The disjoint two-stage approach was applied whereby the latent variable scores for each lower-order construct (Perceived Boiler Performance and Perceived Hob Performance) are calculated and used as indicators for the newly formed first-order construct, Technology Perceptions (TP). The procedure validated the average variance extracted (AVE) in support of convergent validity, while discriminant validity was also established, alongside item reliability and internal consistent reliability.

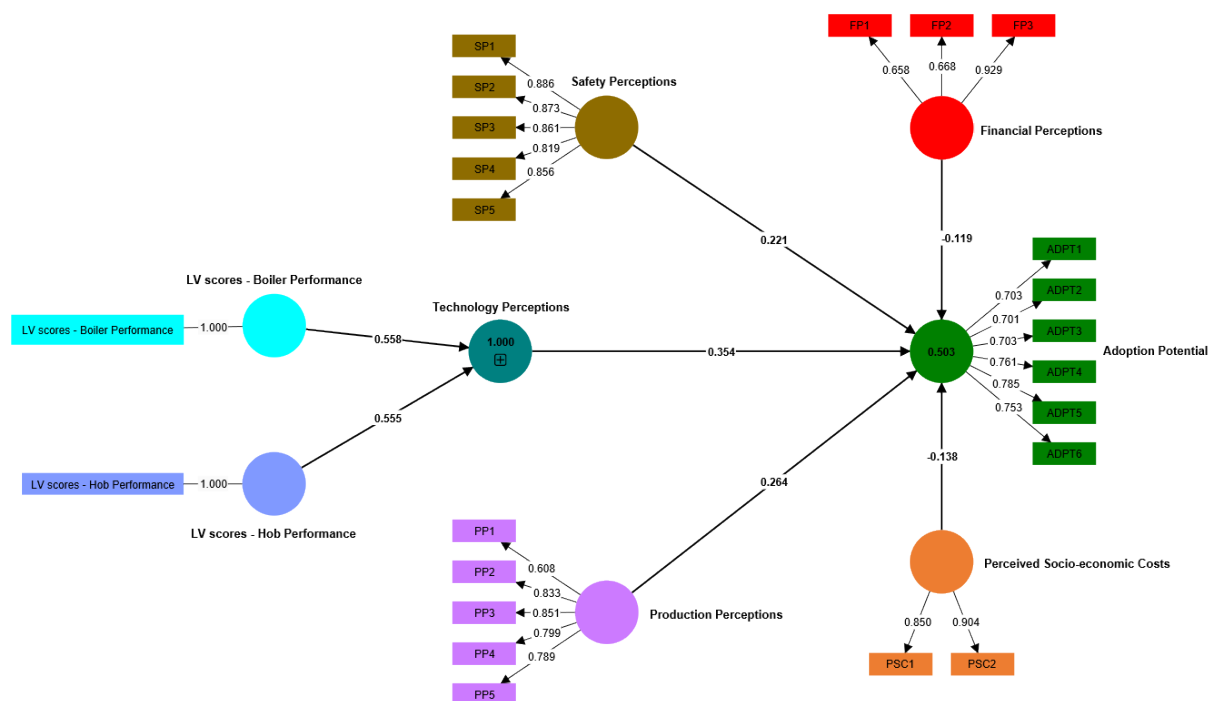

**Fig. S5a. Measurement model assessment for reflective-formative construct (TP): Baseline Group.**

\* The results were visualised in an earlier version of SmartPLS wherein perceived adoption potential was denoted as 'adoption potential' (ADPT). The results are identical.



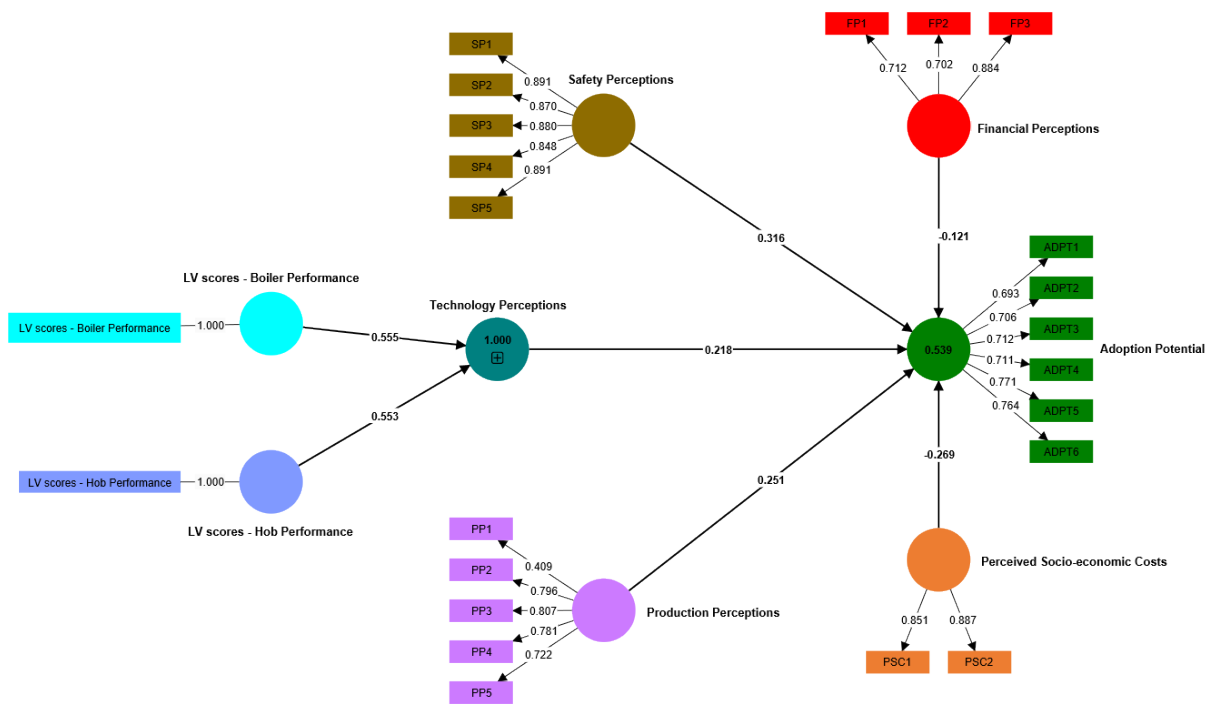

Fig. S5b. Measurement model assessment for reflectively-formative construct (TP): Moderately technology and environmentally Engaged Group.

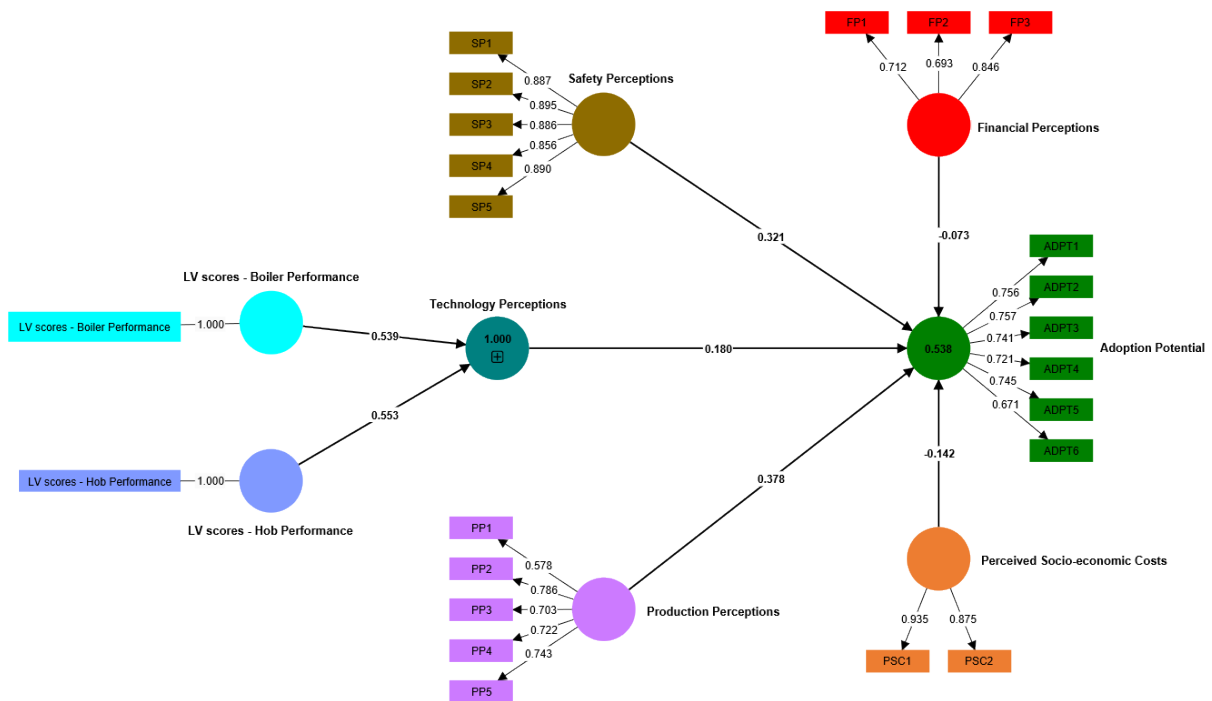

Fig. S5c. Measurement model assessment for reflectively-formative construct (TP): Very technology and environmentally Engaged Group.

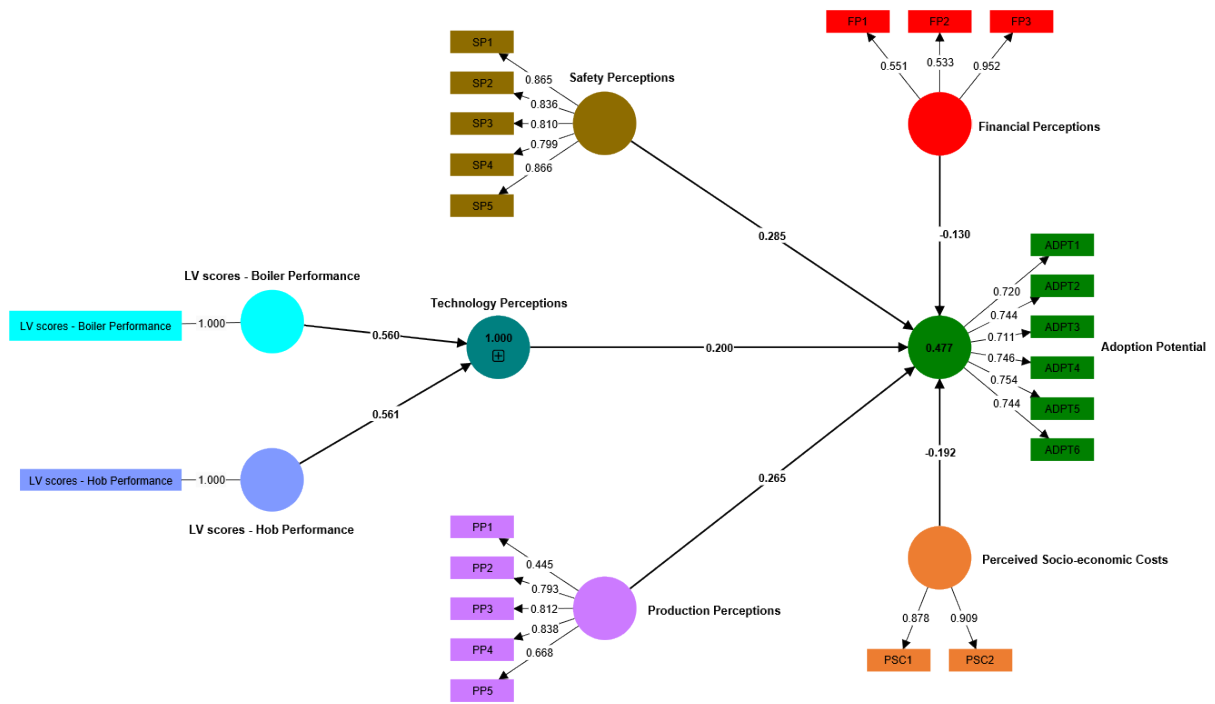

**Fig. S5d. Measurement model assessment for reflective-formative construct (TP): Fuel Stressed Group.**

## 16 Supplementary Note 16: Structural model assessment

Fig. S6a–Fig. S6d report the structural model path coefficients for each consumer sub-group.

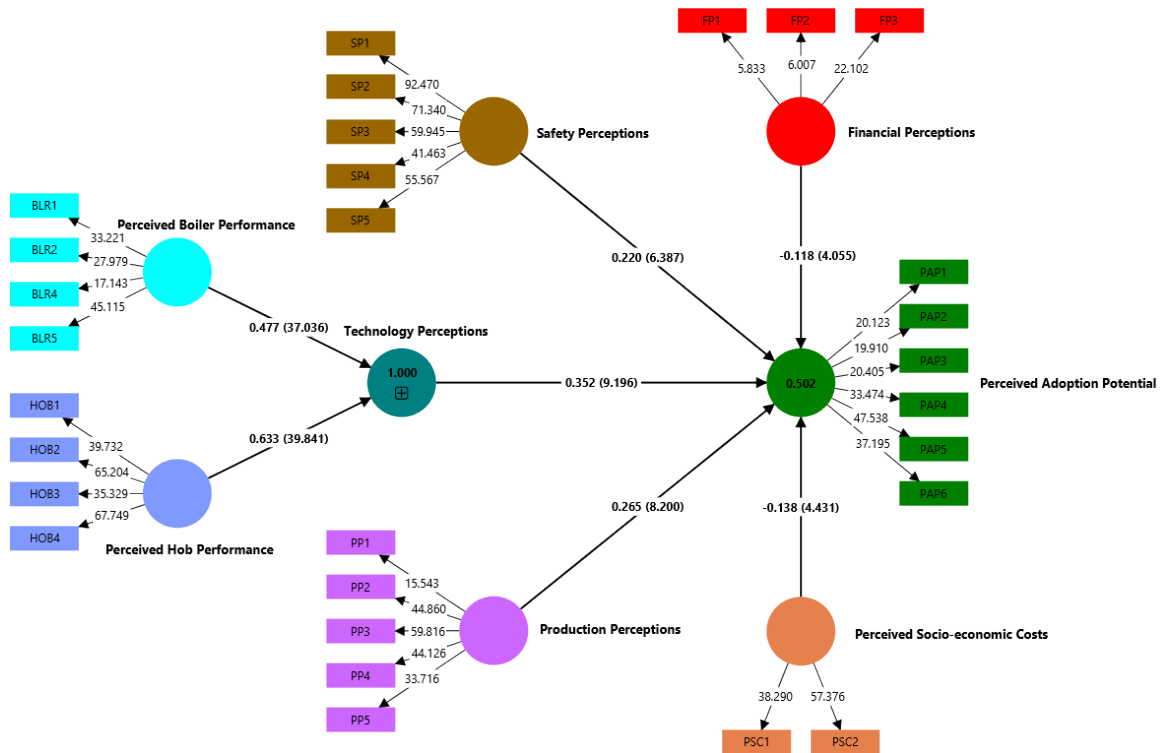

Fig. S6a. Structural model path coefficients for Baseline Group.

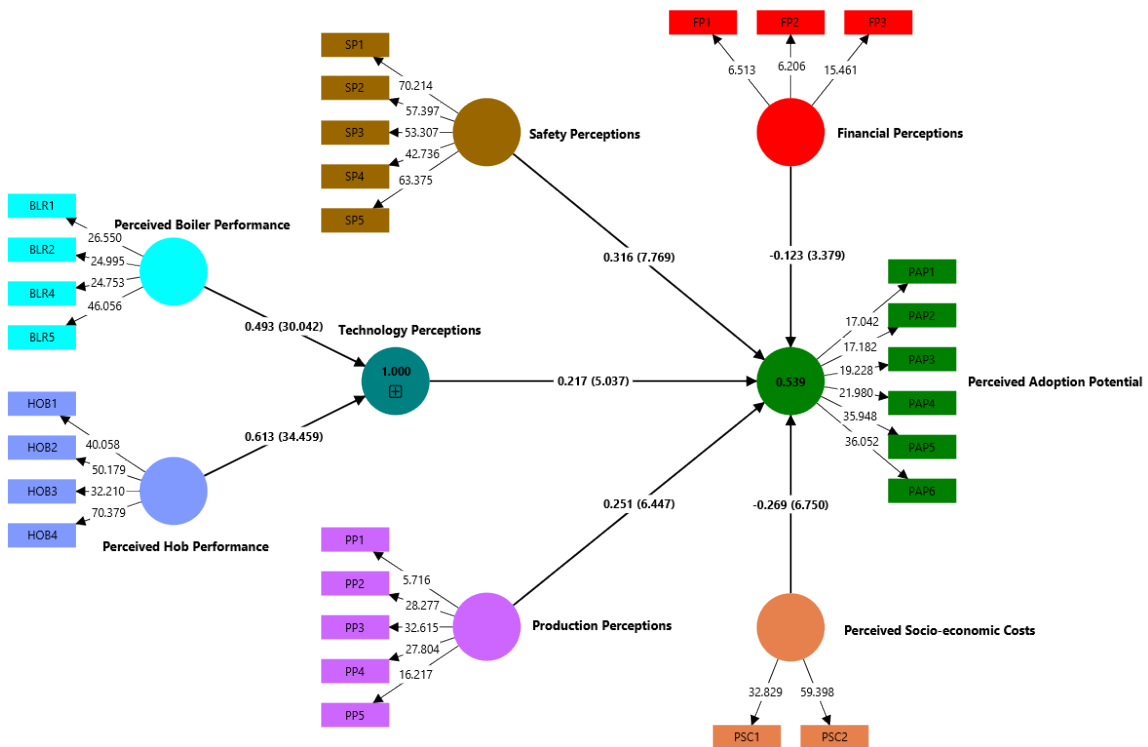

Fig. S6b. Structural model path coefficients for Moderately technology and environmentally Engaged Group.

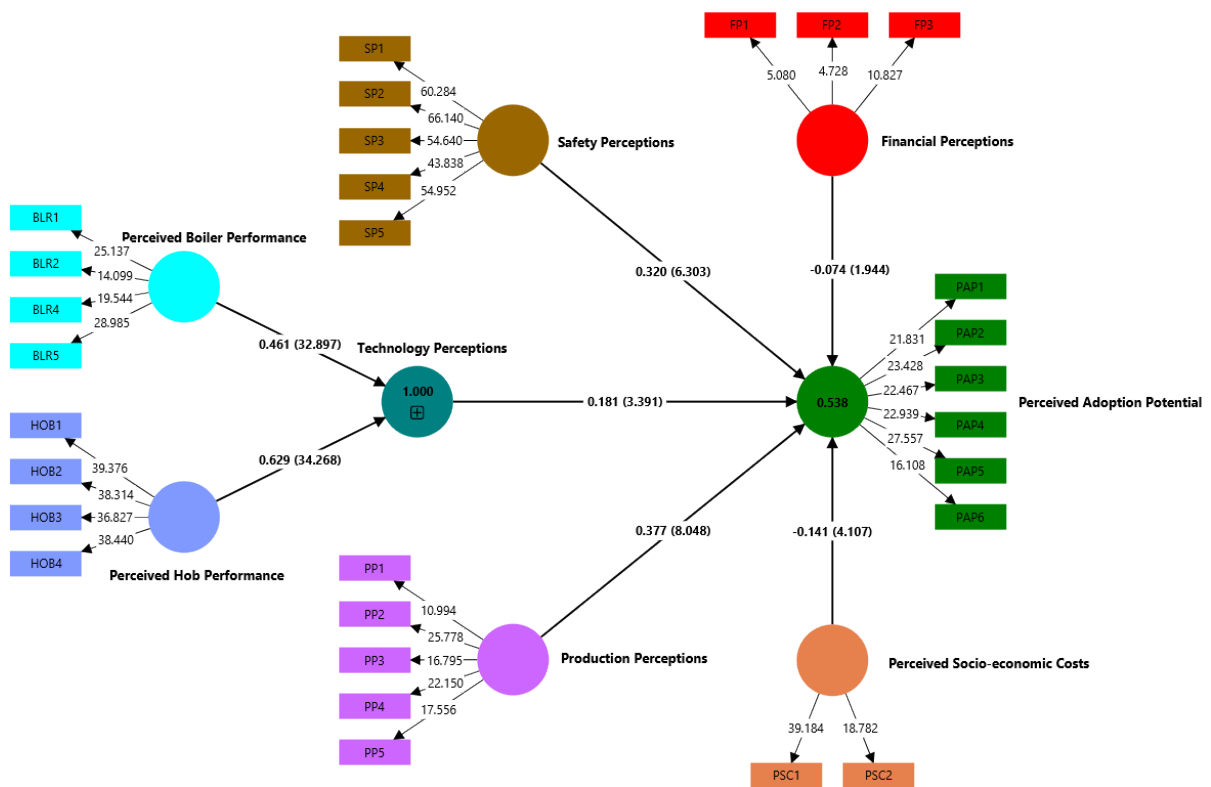

Fig. S6c. Structural model path coefficients for Very technology and environmentally Engaged Group.

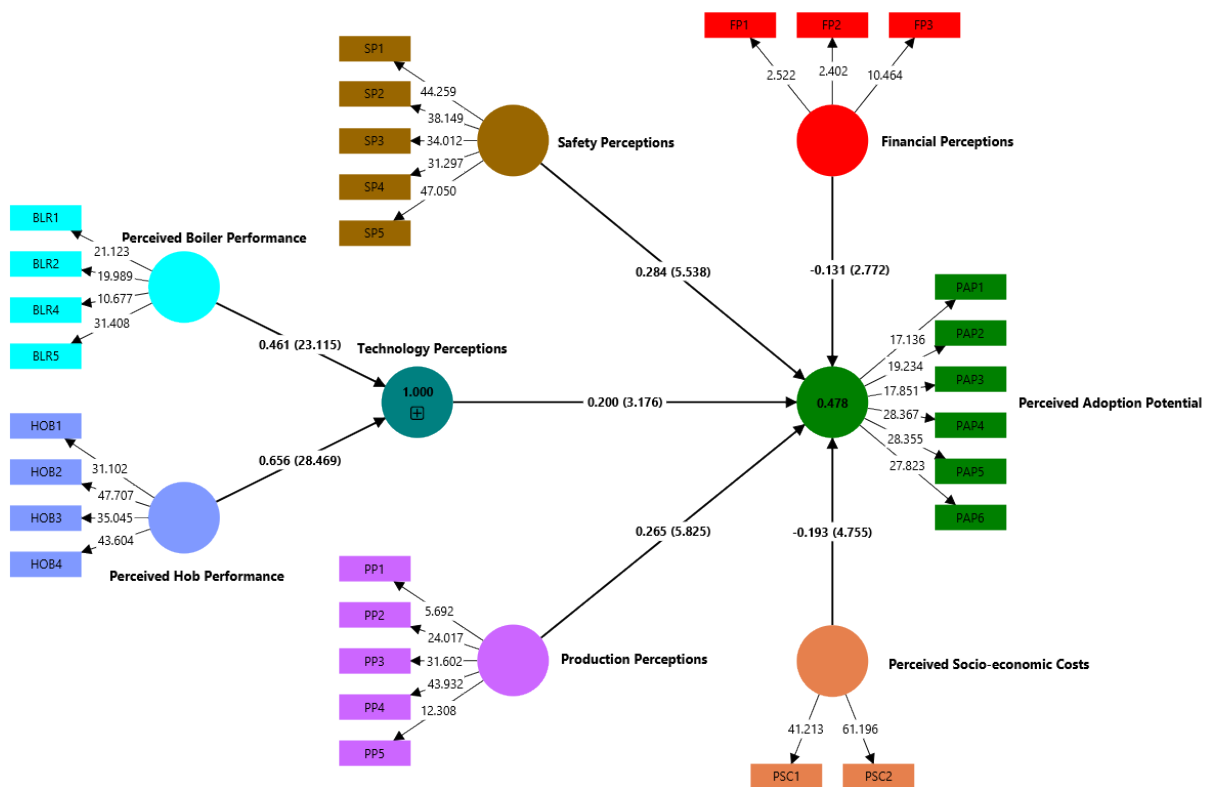

Fig. S6d. Structural model path coefficients for Fuel Stressed Group.

## 17 Supplementary Note 17: Cross-validated predictive ability test

Table S12 reports the results for the CVPAT, which confirms moderative out-of-sample predictive power for the model across each consumer sub-group.

**Table S12. Results for predictive power using CVPAT.**

| <b>Baseline Group</b>           |                                    | <b><i>PLS-SEM vs Indicator average (IA)</i></b> |                |                                |
|---------------------------------|------------------------------------|-------------------------------------------------|----------------|--------------------------------|
|                                 |                                    | <b>Average loss difference</b>                  | <b>t-value</b> | <b><math>\rho</math>-value</b> |
|                                 | Perceived Adoption Potential (PAP) | -0.852                                          | 10.344         | <0.001                         |
|                                 | Technology Perceptions (TP)        | -2.865                                          | 14.136         | <0.001                         |
|                                 | Overall                            | -2.002                                          | 14.678         | <0.001                         |
|                                 |                                    | <b><i>PLS-SEM vs Linear model (LM)</i></b>      |                |                                |
|                                 |                                    | <b>Average loss difference</b>                  | <b>t-value</b> | <b><math>\rho</math>-value</b> |
|                                 | Perceived Adoption Potential (PAP) | 0.035                                           | 1.475          | 0.141                          |
|                                 | Technology Perceptions (TP)        | 3.080                                           | 29.333         | <0.001                         |
|                                 | Overall                            | 1.775                                           | 29.043         | <0.001                         |
| <b>Moderately Engaged Group</b> |                                    | <b><i>PLS-SEM vs Indicator average (IA)</i></b> |                |                                |
|                                 |                                    | <b>Average loss difference</b>                  | <b>t-value</b> | <b><math>\rho</math>-value</b> |
|                                 | Perceived Adoption Potential (PAP) | -0.785                                          | 9.234          | <0.001                         |
|                                 | Technology Perceptions (TP)        | -3.047                                          | 12.070         | <0.001                         |
|                                 | Overall                            | -2.007                                          | 13.131         | <0.001                         |
|                                 |                                    | <b><i>PLS-SEM vs Linear model (LM)</i></b>      |                |                                |
|                                 |                                    | <b>Average loss difference</b>                  | <b>t-value</b> | <b><math>\rho</math>-value</b> |
|                                 | Perceived Adoption Potential (PAP) | 0.016                                           | 0.519          | 0.604                          |
|                                 | Technology Perceptions (TP)        | 2.773                                           | 23.779         | <0.001                         |
|                                 | Overall                            | 1.591                                           | 24.472         | <0.001                         |
| <b>Very Engaged Group</b>       |                                    | <b><i>PLS-SEM vs Indicator average (IA)</i></b> |                |                                |
|                                 |                                    | <b>Average loss difference</b>                  | <b>t-value</b> | <b><math>\rho</math>-value</b> |
|                                 | Perceived Adoption Potential (PAP) | -0.754                                          | 6.973          | <0.001                         |
|                                 | Technology                         | -3.118                                          | 9.566          | <0.001                         |

|                                            |                                                                                       |                                                 |                |                                |
|--------------------------------------------|---------------------------------------------------------------------------------------|-------------------------------------------------|----------------|--------------------------------|
|                                            | Perceptions (TP)<br>Overall                                                           | -2.105                                          | 9.984          | <0.001                         |
| <b><i>PLS-SEM vs Linear model (LM)</i></b> |                                                                                       |                                                 |                |                                |
|                                            |                                                                                       | <b>Average loss<br/>difference</b>              | <b>t-value</b> | <b><math>\rho</math>-value</b> |
|                                            | Perceived<br>Adoption<br>Potential (PAP)<br>Technology<br>Perceptions (TP)<br>Overall | 0.026                                           | 0.501          | 0.617                          |
|                                            |                                                                                       | 2.749                                           | 18.925         | <0.001                         |
|                                            |                                                                                       | 1.582                                           | 18.456         | <0.001                         |
| <b>Fuel Stressed<br/>Group</b>             |                                                                                       | <b><i>PLS-SEM vs Indicator average (IA)</i></b> |                |                                |
|                                            |                                                                                       | <b>Average loss<br/>difference</b>              | <b>t-value</b> | <b><math>\rho</math>-value</b> |
|                                            | Perceived<br>Adoption<br>Potential (PAP)<br>Technology<br>Perceptions (TP)<br>Overall | -0.852                                          | 10.344         | <0.001                         |
|                                            |                                                                                       | -2.865                                          | 14.136         | <0.001                         |
|                                            |                                                                                       | -2.002                                          | 14.678         | <0.001                         |
| <b><i>PLS-SEM vs Linear model (LM)</i></b> |                                                                                       |                                                 |                |                                |
|                                            |                                                                                       | <b>Average loss<br/>difference</b>              | <b>t-value</b> | <b><math>\rho</math>-value</b> |
|                                            | Perceived<br>Adoption<br>Potential (PAP)<br>Technology<br>Perceptions (TP)<br>Overall | 0.035                                           | 1.475          | 0.141                          |
|                                            |                                                                                       | 3.080                                           | 29.333         | <0.001                         |
|                                            |                                                                                       | 1.775                                           | 29.043         | <0.001                         |

## 18 Supplementary Note 18: Importance-performance map analysis

Table S13 reports the results for the importance-performance map analysis conducted at the construct level for each sub-group.

**Table S13. Total effects and latent variable index values for predictors of perceived adoption potential.**

| Consumer sub-group             | IMPA measurement              | <i>Adoption construct</i> |        |        |        |        |        |        |
|--------------------------------|-------------------------------|---------------------------|--------|--------|--------|--------|--------|--------|
|                                |                               | BLR                       | HOB    | TP     | FP     | PSC    | SP     | PP     |
| Baseline Group (BLG)           | Importance (total effects)    | 0.168                     | 0.223  | 0.352  | -0.118 | -0.138 | 0.220  | 0.265  |
|                                | Performance (LV index values) | 68.387                    | 59.426 | 63.503 | 64.843 | 48.056 | 55.612 | 59.417 |
| Moderately Engaged Group (MEG) | Importance (total effects)    | 0.107                     | 0.133  | 0.217  | -0.123 | -0.269 | 0.316  | 0.251  |
|                                | Performance (LV index values) | 70.113                    | 62.318 | 66.039 | 63.206 | 44.189 | 58.745 | 67.131 |
| Very Engaged Group (VEG)       | Importance (total effects)    | 0.083                     | 0.114  | 0.181  | -0.074 | -0.141 | 0.320  | 0.377  |
|                                | Performance (LV index values) | 75.718                    | 68.281 | 71.659 | 62.589 | 45.081 | 66.027 | 73.558 |
| Fuel Stressed Group (FSG)      | Importance (total effects)    | 0.092                     | 0.131  | 0.200  | -0.131 | -0.193 | 0.284  | 0.265  |
|                                | Performance (LV index values) | 71.404                    | 61.403 | 65.634 | 57.759 | 49.664 | 57.611 | 60.395 |

Fig. S7a–Fig. S7d report the importance-performance map analyses for each consumer sub-group.

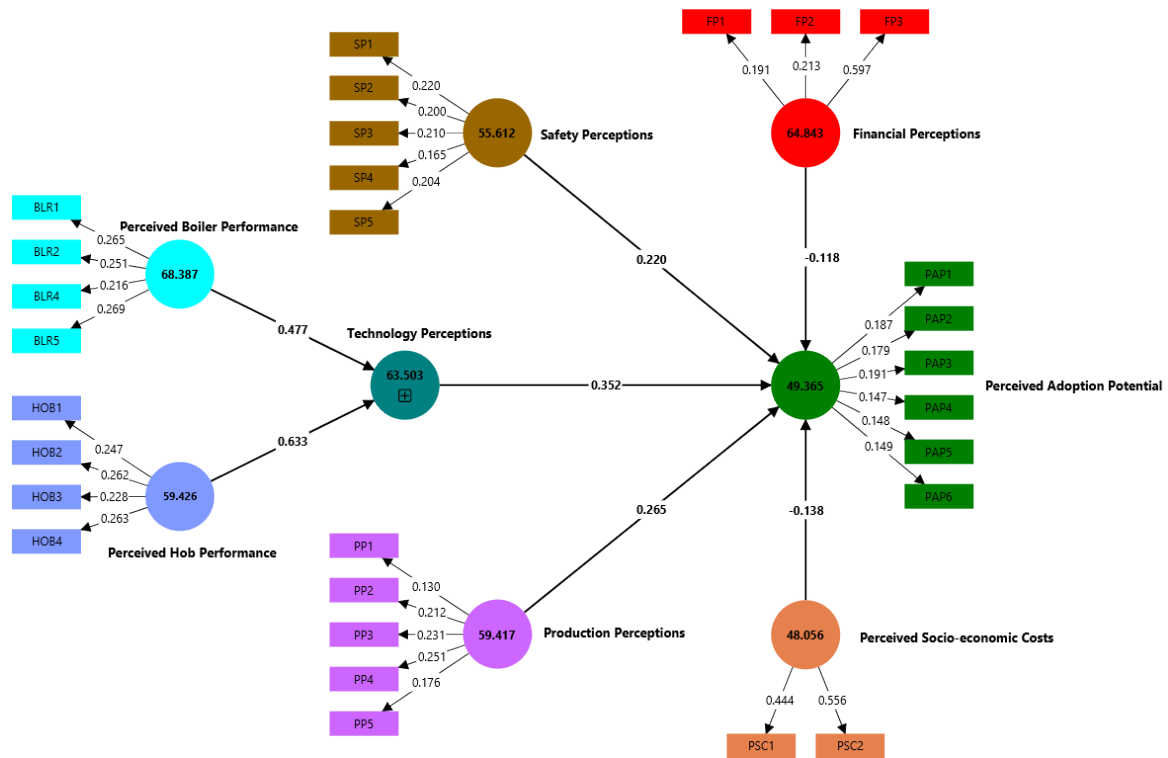

Fig. S7a. Importance-performance map analysis for Baseline Group.

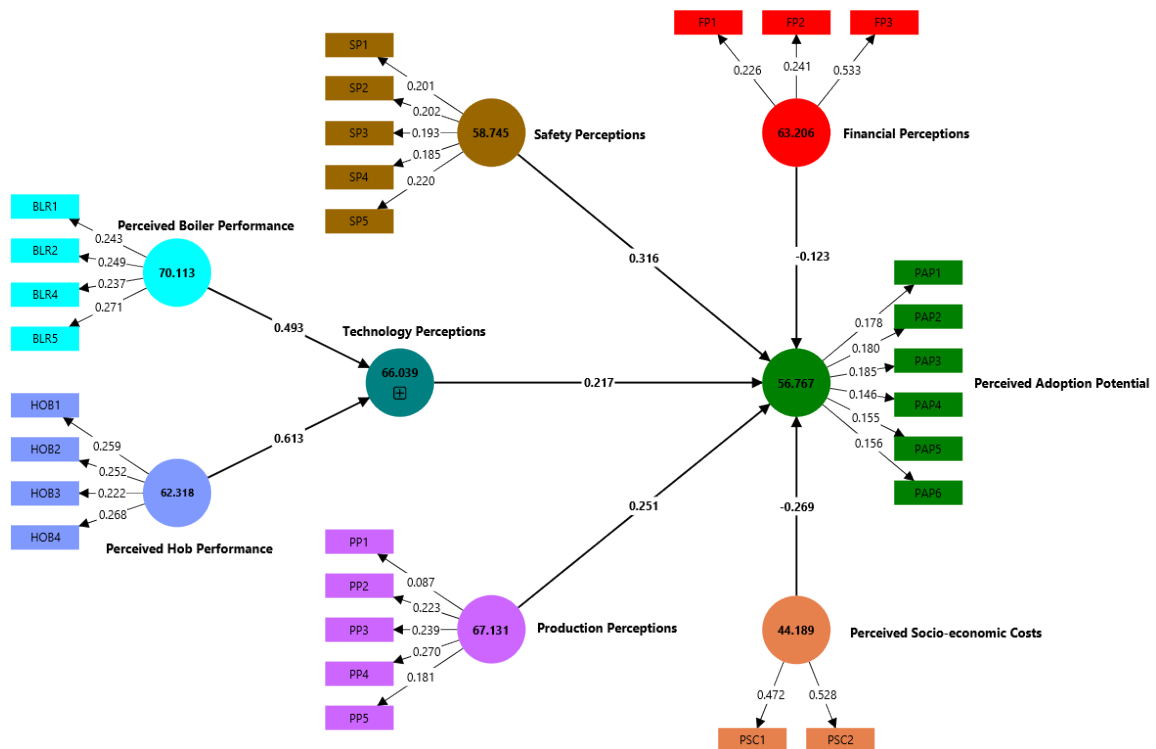

Fig. S7b. Importance-performance map analysis for Moderately technology and environmentally Engaged Group.



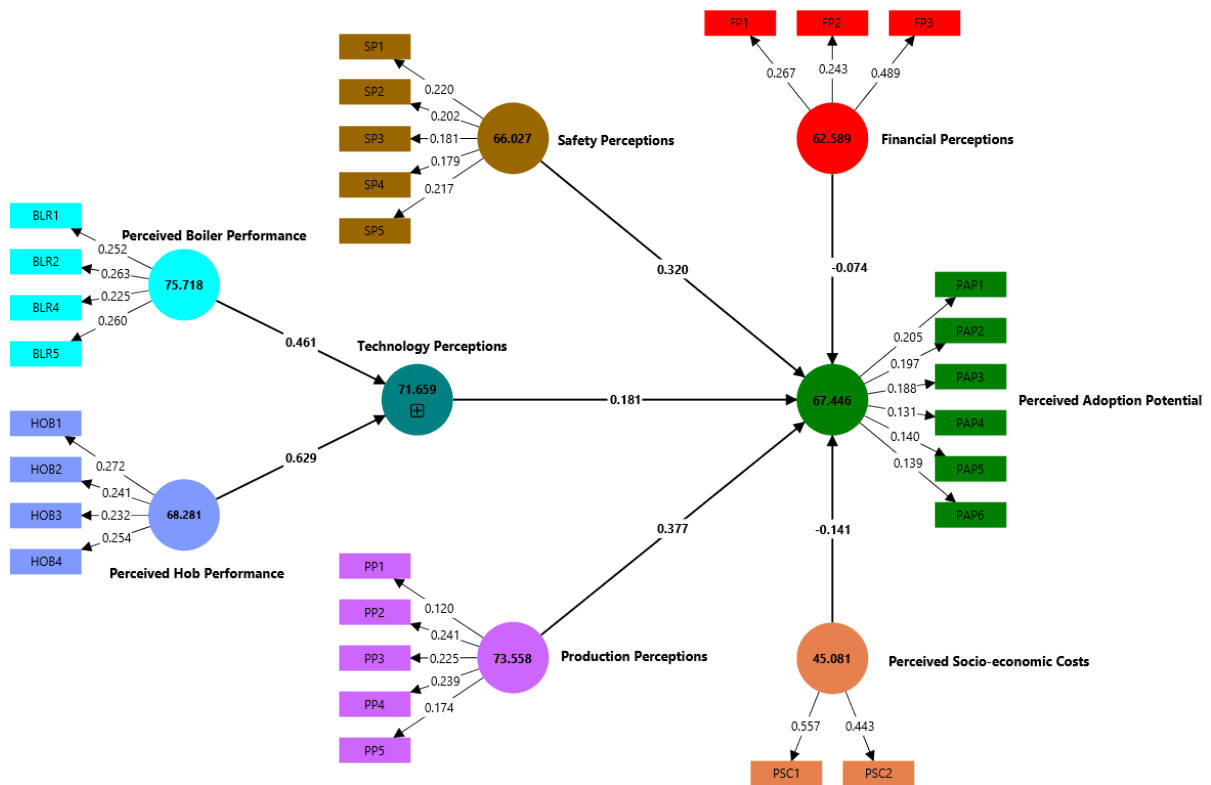

Fig. S7c. Importance-performance map analysis for Very technology and environmentally Engaged Group.

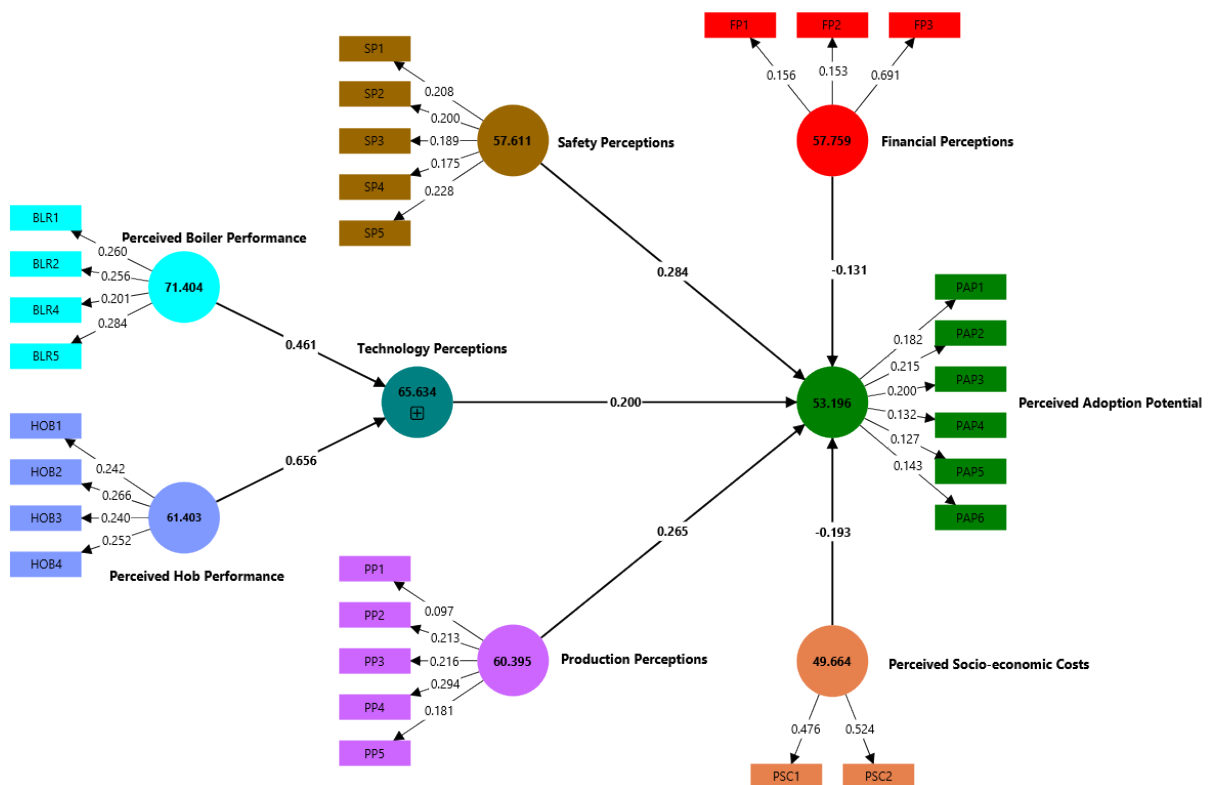

Fig. S7d. Importance-performance map analysis for Fuel Stressed Group.

## **18.1 Summary of importance-performance map analysis for each consumer sub-group**

### **18.1.1 Baseline Group**

For respondents in the BLG, which foreseeably represents the larger proportion of UK society, technology perceptions is the most influential predictor of perceived adoption potential, followed by production and safety perceptions. It follows that more strategic efforts are needed to assure consumers that hydrogen home appliances have a performance advantage over existing natural gas boilers and hobs. In terms of negative predictors, financial perceptions and perceived socio-economic costs have a similar effect on perceived adoption potential. However, more resources should be allocated to mitigating socio-economic concerns, since this construct had the lowest latent variable (LV) index value (i.e. worst performance) in the model (LV = 48.056). By contrast, constructs located at the positive end of the importance-performance matrix are clustered closely together.

### **18.1.2 Moderately Engaged Group**

Following the trend observed with the BLG, positive constructs are also clustered tightly for the MEG in terms of technology performance, albeit with a marginal increase overall. Safety perceptions ranks as the most critical predictor of perceived adoption potential, followed by perceived socio-economic costs. Moreover, these constructs have the lowest performance (SP: LV = 58.745; PSC: LV = 44.189), which reinforces the need for strategic measures to address the safety and macro-economic dimensions of domestic hydrogen adoption. Production perceptions is the next most important positive predictor, followed by technology perceptions, with little discrepancy in terms of their respective performance. In comparative terms, financial perceptions appear to be less relevant to the MEG compared to other constructs, which calls for further interrogation and validation in follow-up studies, for example, by testing for moderating effects related to socio-demographic variables.

### **18.1.3 Very Engaged Group**

Respondents with high levels of technology and environmental engagement attribute most importance to production perceptions ( $\beta = 0.377$ ), whereas technology perceptions has more a moderate influence ( $\beta = 0.181$ ). Safety perceptions ( $\beta = 0.320$ ; LV = 66.027) is the next most critical factor to address after production perceptions, whereas perceived socio-economic costs has a slighter smaller total effect than

technology perceptions, but a considerably lower performance ( $\beta = -0.141$ ; LV = 45.081). Mirroring results for the MEG, financial perceptions is the least influential factor.

#### **18.1.4 Fuel Stressed Group**

In comparison to other sub-groups, fuel stressed respondents present a narrow range within the IMPA, since no positive construct exceeds 0.300, while negative constructs are below -0.200 on the x-axis. This clustering effect corresponds to near equal levels of importance being attributed to the safety and production aspects of the domestic hydrogen transition, which represent the foremost areas of strategic importance. As a result, fuel stressed respondents transmit less overall divergence in perceptions of different adoption factors, which demarcates this sub-group as more homogenous within the overall context of the STEEP framework when tested from a sufficiency perspective.

Technology perceptions ( $\beta = 0.200$ ; LV = 65.634) and perceived socio-economic costs ( $\beta = -0.193$ ; LV = 49.664) have near equivalent effect sizes. However, there is more scope for improving perceived adoption potential by allocating resources towards mitigating socio-economic concerns, which aligns to the disproportionate livelihood pressures facing fuel stressed citizens. Despite this imperative, when evaluated against other factors, the FSG nevertheless places least weight on the micro-economic dimension associated with the purchasing and running costs of hydrogen appliances. Based on the results, it can be conjectured that citizens facing fuel stress pressures perceive switching to a hydrogen home as a potential mechanism for alleviating safety concerns and improving the environment, which is consistent with prior research.

## 19 Supplementary Note 19: Bottleneck results for necessary condition analysis

Table S14. Bottleneck tables showing actual IMPA values for enabling domestic hydrogen adoption potential.

| <b>Baseline Group (BLG)</b>                                          |                           |                               |                               |  |
|----------------------------------------------------------------------|---------------------------|-------------------------------|-------------------------------|--|
| <i>Perceived Adoption Potential</i>                                  | <i>Safety Perceptions</i> | <i>Technology Perceptions</i> | <i>Production Perceptions</i> |  |
| 0                                                                    | 0                         | 0                             | 0                             |  |
| 10                                                                   | 0.148                     | 0                             | 0                             |  |
| 20                                                                   | 0.739                     | 0                             | 0.148                         |  |
| 30                                                                   | 0.886                     | 0                             | 0.148                         |  |
| 40                                                                   | 0.886                     | 0.886                         | 0.148                         |  |
| 50                                                                   | 0.886                     | 0.886                         | 0.148                         |  |
| 60                                                                   | 2.806                     | 0.886                         | 0.148                         |  |
| 70                                                                   | 2.806                     | 14.771                        | 0.148                         |  |
| 80                                                                   | 6.352                     | 14.771                        | 13.442                        |  |
| 90                                                                   | 52.290                    | 46.381                        | 33.235                        |  |
| 100                                                                  | 77.696                    | 93.058                        | 77.400                        |  |
| <b>Moderately technology and environmentally Engaged Group (MEG)</b> |                           |                               |                               |  |
| <i>Perceived Adoption Potential</i>                                  | <i>Safety Perceptions</i> | <i>Technology Perceptions</i> | <i>Production Perceptions</i> |  |
| 0                                                                    | 0                         | 0                             | 0                             |  |
| 10                                                                   | 0.218                     | 0                             | 0.218                         |  |
| 20                                                                   | 0.218                     | 0                             | 0.218                         |  |
| 30                                                                   | 0.218                     | 0                             | 0.218                         |  |
| 40                                                                   | 0.218                     | 0                             | 0.873                         |  |
| 50                                                                   | 0.218                     | 0.655                         | 0.873                         |  |
| 60                                                                   | 0.437                     | 0.873                         | 3.057                         |  |
| 70                                                                   | 2.838                     | 0.873                         | 3.057                         |  |
| 80                                                                   | 3.493                     | 2.838                         | 3.057                         |  |
| 90                                                                   | 8.297                     | 32.751                        | 7.424                         |  |
| 100                                                                  | 47.380                    | 80.786                        | 62.445                        |  |
| <b>Very technology and environmentally Engaged Group (VEG)</b>       |                           |                               |                               |  |
| <i>Perceived Adoption Potential</i>                                  | <i>Safety Perceptions</i> | <i>Technology Perceptions</i> | <i>Production Perceptions</i> |  |
| 0                                                                    | 0                         | 0                             | 0                             |  |
| 10                                                                   | 0                         | 0.302                         | 0                             |  |
| 20                                                                   | 0                         | 0.302                         | 0                             |  |
| 30                                                                   | 0.302                     | 0.302                         | 0.604                         |  |
| 40                                                                   | 0.302                     | 0.302                         | 0.604                         |  |
| 50                                                                   | 0.604                     | 0.302                         | 0.604                         |  |
| 60                                                                   | 0.604                     | 0.906                         | 0.604                         |  |
| 70                                                                   | 3.927                     | 0.906                         | 0.604                         |  |

|     |        |        |        |
|-----|--------|--------|--------|
| 80  | 3.927  | 0.906  | 3.625  |
| 90  | 6.949  | 47.734 | 26.284 |
| 100 | 43.807 | 86.103 | 71.299 |

**Fuel Stressed Group**

| <b><i>Perceived Adoption Potential</i></b> | <b><i>Safety Perceptions</i></b> | <b><i>Technology Perceptions</i></b> | <b><i>Production Perceptions</i></b> |
|--------------------------------------------|----------------------------------|--------------------------------------|--------------------------------------|
| 0                                          | 0                                | 0                                    | 0                                    |
| 10                                         | 0                                | 0                                    | 0.264                                |
| 20                                         | 0.792                            | 0                                    | 0.264                                |
| 30                                         | 0.792                            | 0                                    | 0.264                                |
| 40                                         | 0.792                            | 0                                    | 0.264                                |
| 50                                         | 0.792                            | 2.375                                | 0.264                                |
| 60                                         | 2.902                            | 2.639                                | 0.264                                |
| 70                                         | 2.902                            | 8.443                                | 0.792                                |
| 80                                         | 3.430                            | 29.024                               | 8.971                                |
| 90                                         | 14.2480                          | 57.520                               | 78.1                                 |
| 100                                        | 85.488                           | 63.588                               | 95.778                               |

## 20 Supplementary Note 20: Necessary condition analysis scatterplots

Figs. S8–S11 present the individual scatterplot charts using the ceiling envelopment free disposal hull (CE-FDH) for each consumer sub-group by construct. The visualisation supplements the grouped results presented in Figs. 13–16

### NCA scatterplots for the Baseline Group

Figs. 8a–8c present the results for the Baseline Group (BLG).

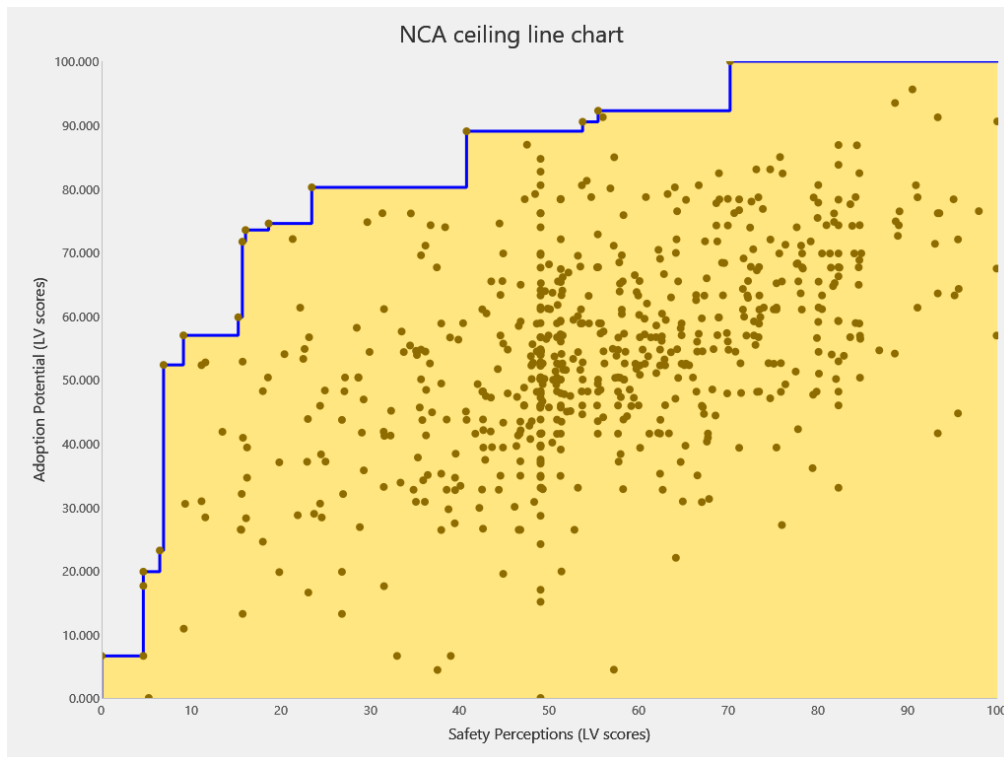

**Fig. S8a. NCA chart for technology perceptions as a predictor of perceived adoption potential.**

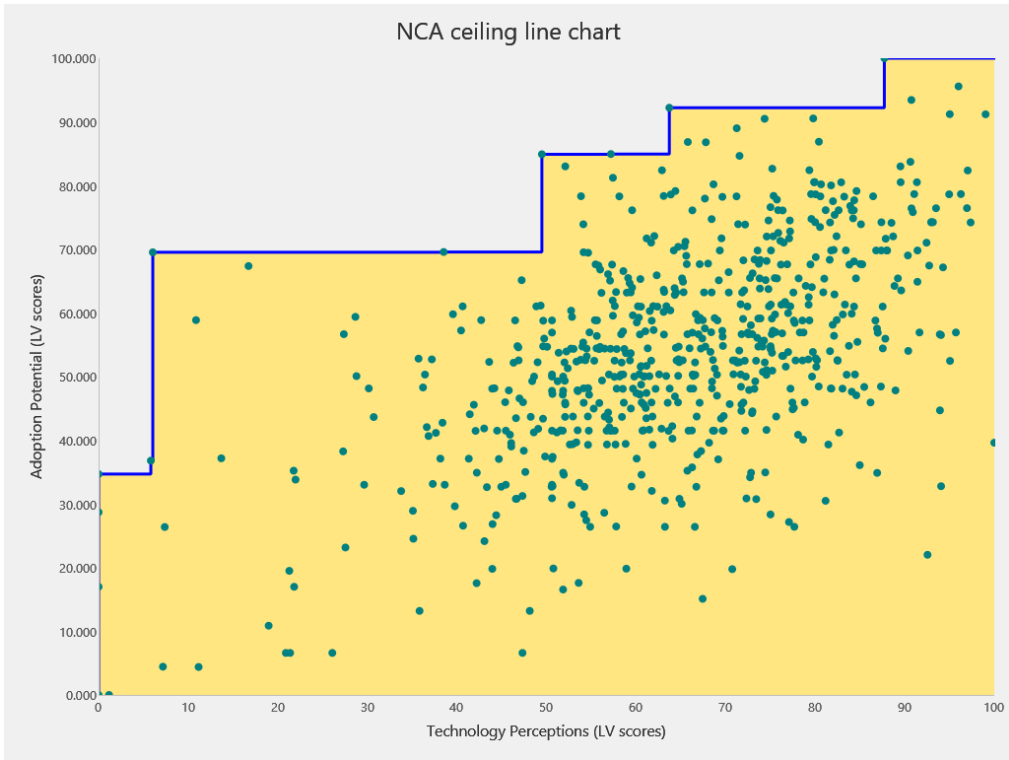

**Fig. S8b. NCA chart for technology perceptions as a predictor of perceived adoption potential.**

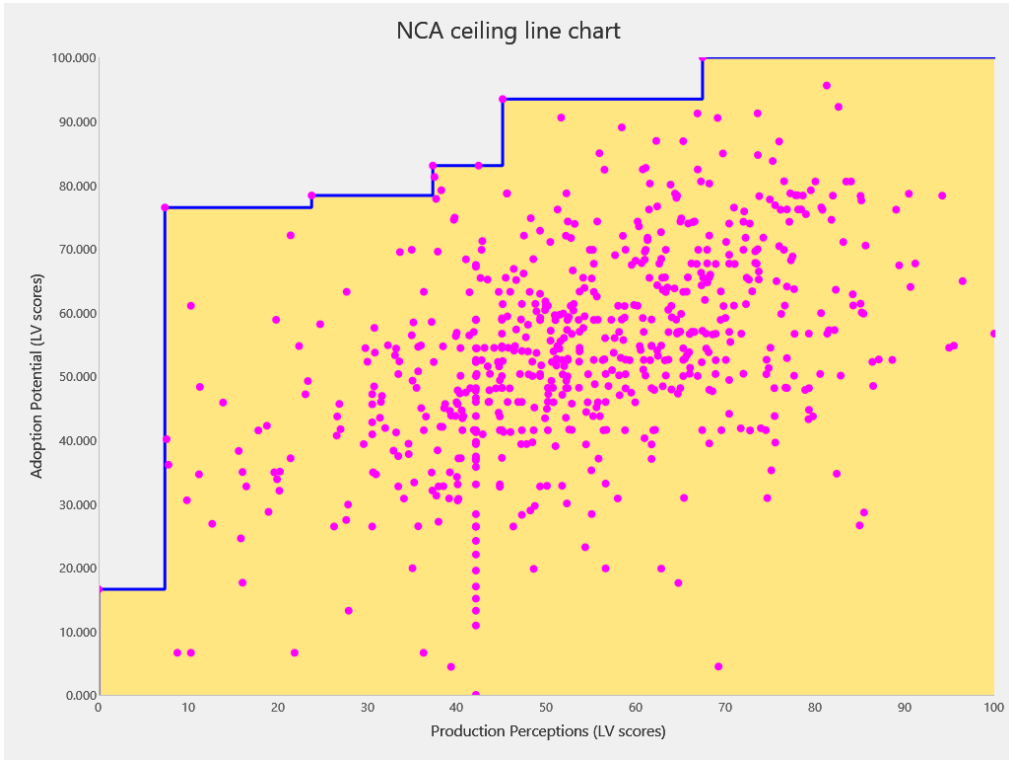

**Fig. S8c. NCA chart for productions perceptions as a predictor of perceived adoption potential.**

## NCA scatterplots for the Moderately technology and environmentally Engaged Group

Figs. S9a–S9c present the results for the Moderately technology and environmentally Engaged Group (MEG).

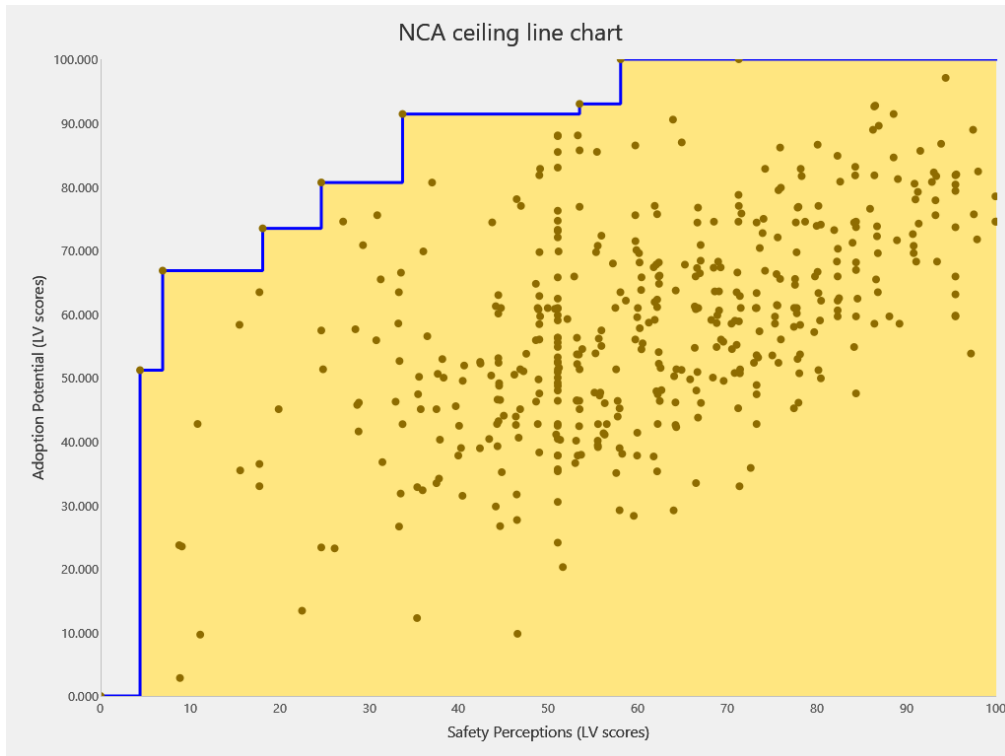

**Fig. S9a. NCA chart for safety perceptions as a predictor of perceived adoption potential.**



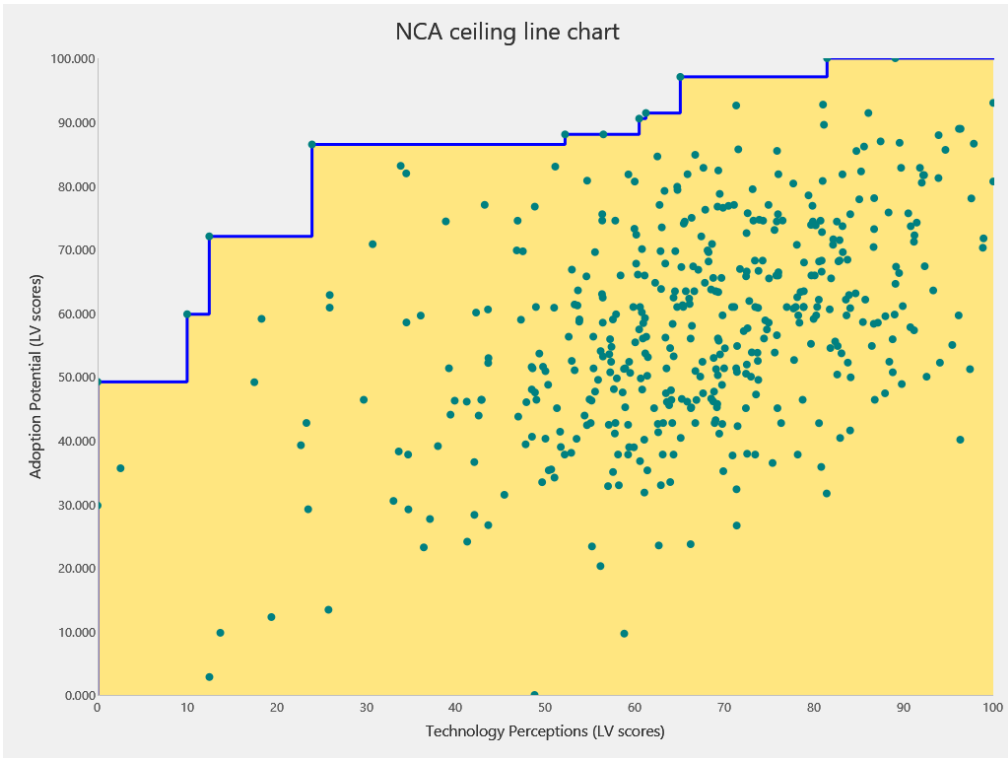

**Fig. S9b. NCA chart for technology perceptions as a predictor of perceived adoption potential.**

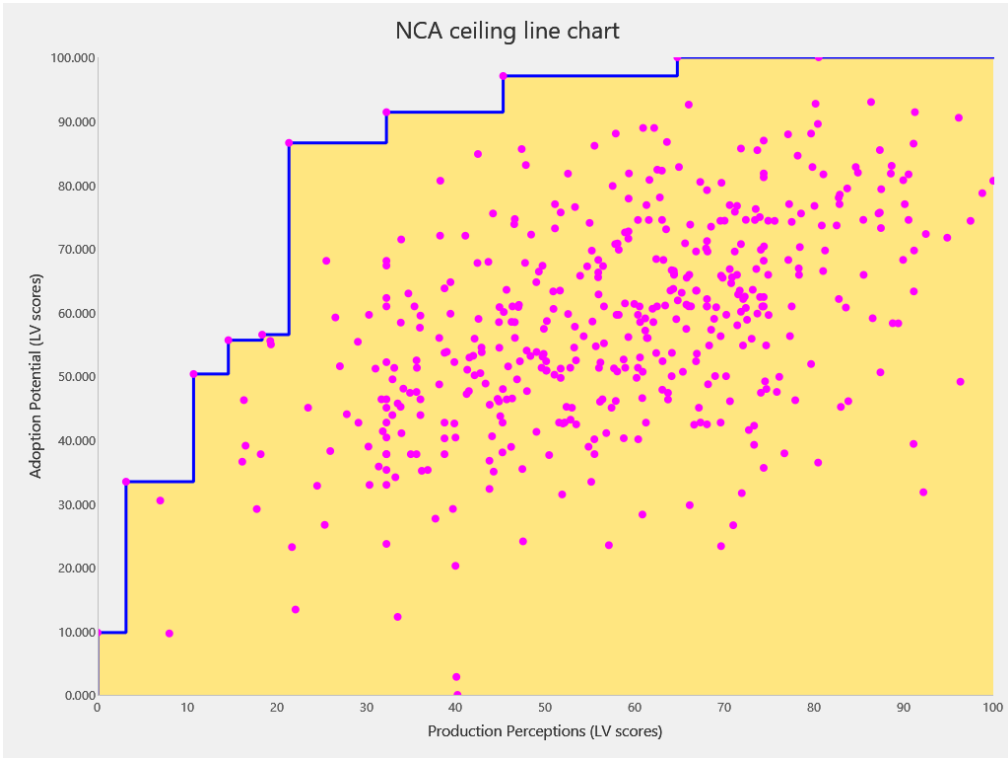

**Fig. S9c. NCA chart for production perceptions as a predictor of perceived adoption potential.**

## NCA scatterplots for the Very technology and environmentally Engaged Group

Figs. S10a–S10c present the results for the Very technology and environmentally Engaged Group (VEG).

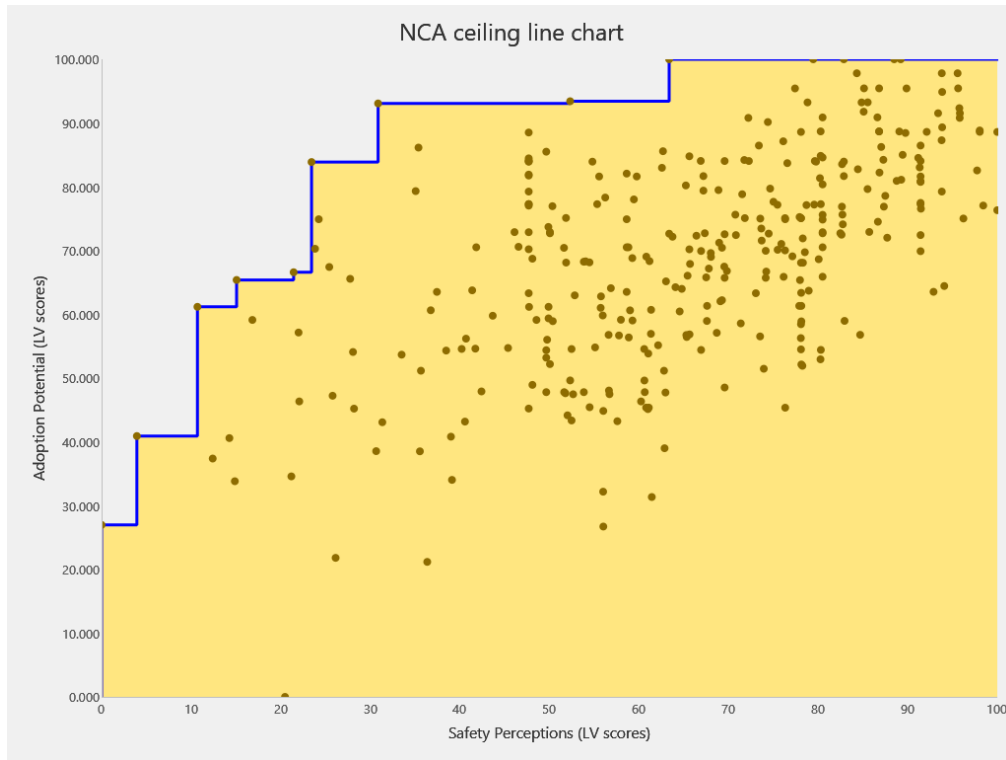

**Fig. S10a. NCA chart for safety perceptions as a predictor of perceived adoption potential.**

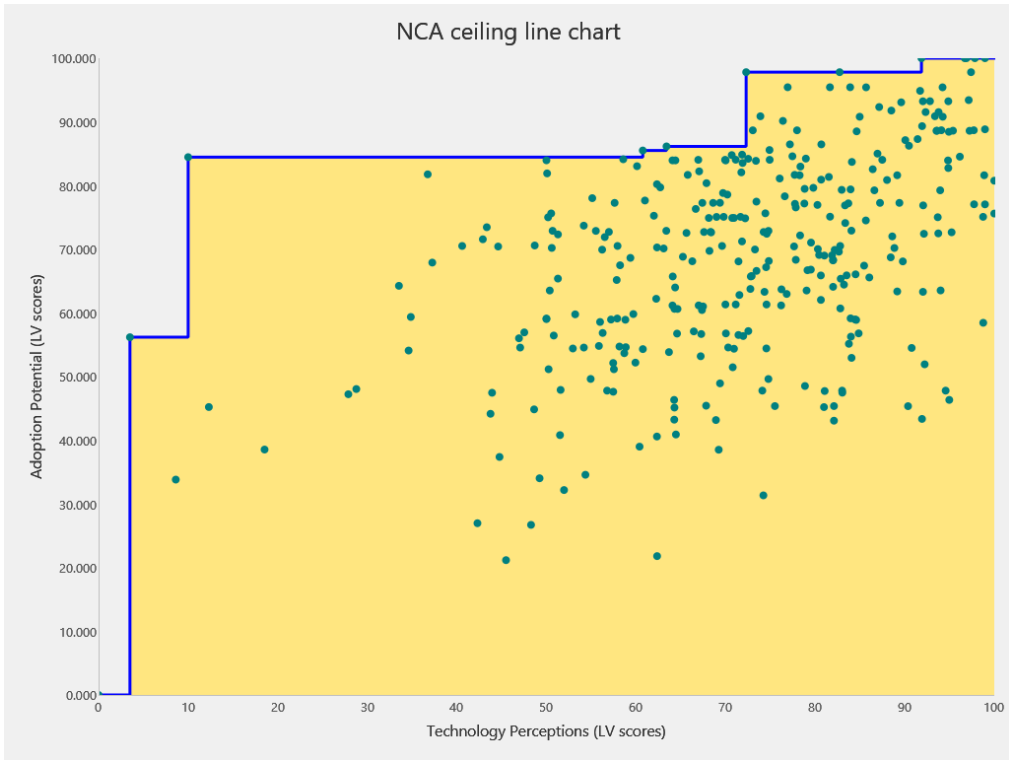

**Fig. S10b. NCA chart for technology perceptions as a predictor of perceived adoption potential.**

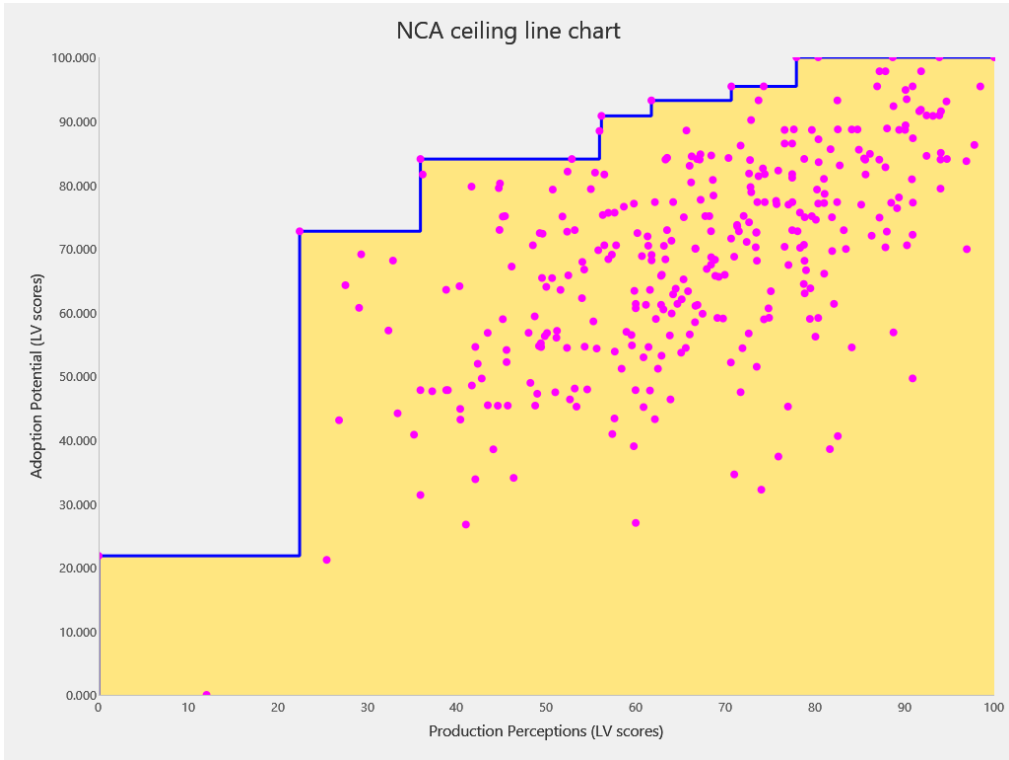

**Fig. S10c. NCA chart for production perceptions as a predictor of perceived adoption potential.**

## NCA scatterplots for the Fuel Stressed Group

Figs. S11a–S11c present the results for the Fuel Stressed Group (FSG).

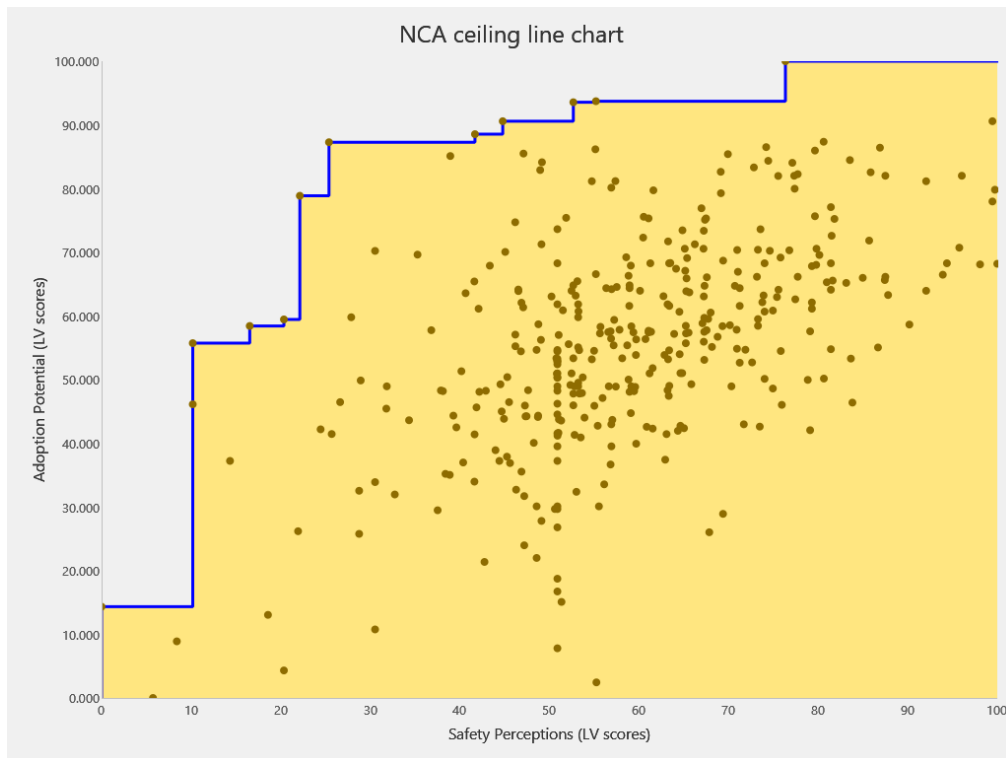

**Fig. S11a.** NCA chart for safety perceptions as a predictor of perceived adoption potential.

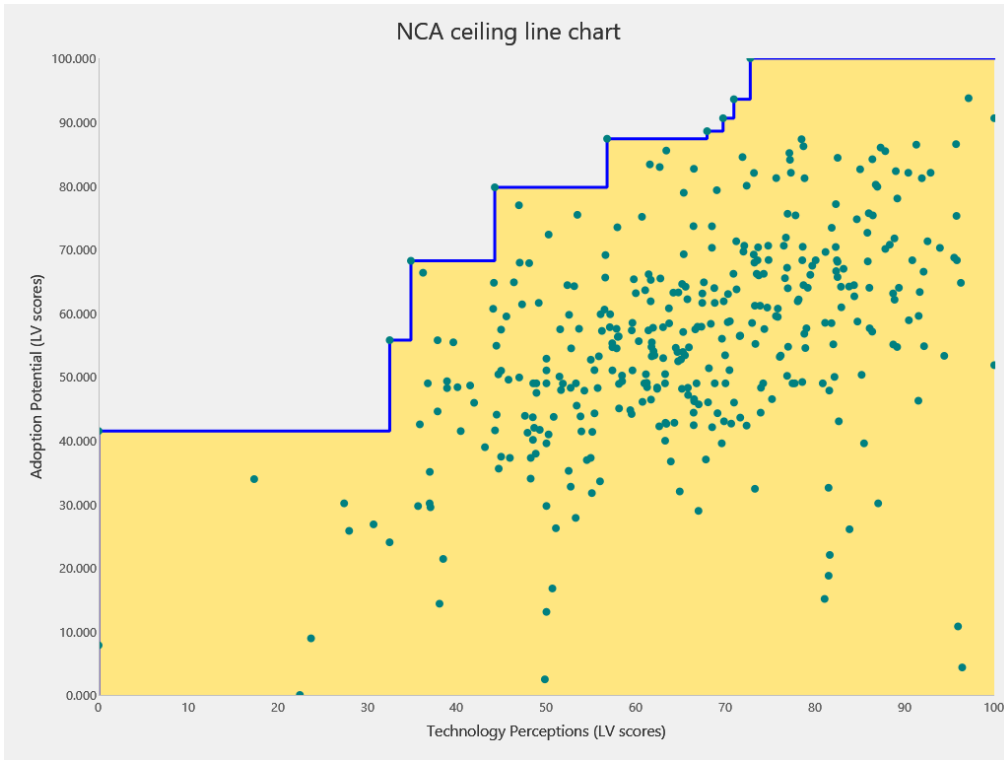

**Fig. S11b. NCA chart for technology perceptions as a predictor of perceived adoption potential.**

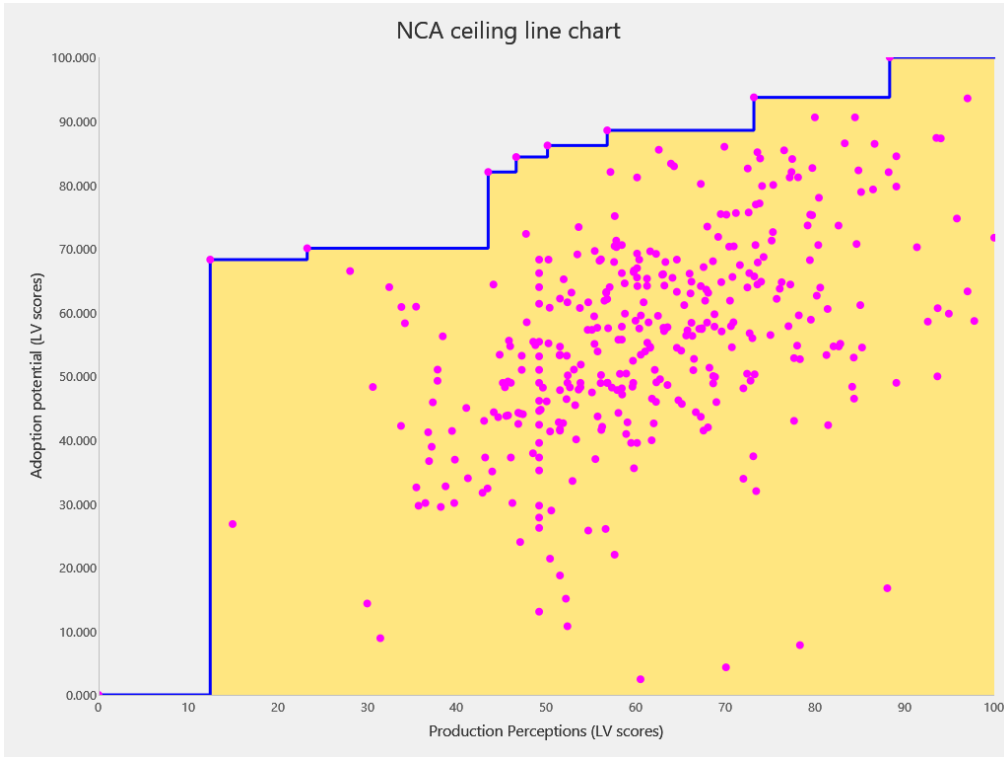

**Fig. S11c. NCA chart for production perceptions as a predictor of perceived adoption potential.**

## References

- 1 J. Rosenow, *Cell Reports Sustainability*, 2024, **1**, 100010.
- 2 J. Rosenow, *Joule*, 2022, **6**, 2225–2228.
- 3 Element Energy, *Consumer cost of heat decarbonisation Integrated Report*, 2022.
- 4 J. Giehl, J. Hollnagel and J. Müller-Kirchenbauer, *Int J Hydrogen Energy*, 2023, **48**, 16037–16047.
- 5 M. Scheepers, S. G. Palacios, E. Jegu, L. P. Nogueira, L. Rutten, J. van Stralen, K. Smekens, K. West and B. van der Zwaan, *Renewable and Sustainable Energy Reviews*, 2022, **158**, 112097.
- 6 F. Jalil-Vega, I. García Kerdan and A. D. Hawkes, *Appl Energy*, 2020, **262**, 114445.
- 7 J. A. Gordon, N. Balta-Ozkan and S. A. Nabavi, *Energy Res Soc Sci*, 2023, **104**, 1.
- 8 R. Khalid and C. Foulds, *The social dimensions of moving away from gas cookers and hobs: Challenges and opportunities in transition to low-carbon cooking*, London: UK Energy Research Centre, 2020.
- 9 C. C. Michelsen and R. Madlener, *Homeowners' motivation to adopt a residential heating system: A principal component analysis*, 2011.
- 10 C. C. Michelsen and R. Madlener, *Integrated theoretical framework for a homeowner's decision in favor of an innovative residential heating system*, FCN Working Paper No. 2/2010, Institute for Future Energy Consumer Needs and Behavior, RWTH Aachen University (2010), 2010.
- 11 C. C. Michelsen and R. Madlener, *Energy Econ*, 2012, **34**, 1271–1283.
- 12 C. C. Michelsen and R. Madlener, *Energy Policy*, 2013, **57**, 221–233.
- 13 C. C. Michelsen and R. Madlener, *J Clean Prod*, 2017, **141**, 1286–1292.
- 14 M. C. Claudy, C. Michelsen and A. O'Driscoll, *Energy Policy*, 2011, **39**, 1459–1469.
- 15 J. A. Gordon, N. Balta-Ozkan and S. Nabavi, *Renewable & Sustainable Energy Reviews*, 2023, **188**, 1.
- 16 M. Scott and G. Powells, *Energy Res Soc Sci*, 2020, **61**, 101346.
- 17 F. Fylan, M. Fletcher and S. Christmas, *H21: Public perceptions of converting the gas network to hydrogen*, Leeds Beckett University, 2020.
- 18 L. L. Lozano, B. Bharadwaj, A. de Sales, A. Kambo and P. Ashworth, *Int J Hydrogen Energy*, 2022, **47**, 28806–28818.
- 19 M. D. Scovell, *Int J Hydrogen Energy*, 2022, **47**, 10441–10459.
- 20 M. Scovell and A. Walton, *Int J Hydrogen Energy*, 2023, **48**, 31825–31836.
- 21 K. Beasy, S. Lodewyckx and P. Mattila, *Int J Hydrogen Energy*, 2023, **48**, 8386–8397.
- 22 K. J. Dillman and J. Heinonen, *Renewable and Sustainable Energy Reviews*, 2022, **167**, 112648.
- 23 J. Yap and B. McLellan, *Int J Hydrogen Energy*, 2023, **54**, 66–83.
- 24 L. L. Lozano, B. Bharadwaj, A. de Sales, A. Kambo and P. Ashworth, *Int J Hydrogen Energy*, 2022, **47**, 28806–28818.

- 25 V. Martin, P. Ashworth, S. Petrova, B. Wade, K. Witt and E. Clarke, *Public perceptions of hydrogen: 2021 national survey results*, Future Fuels CRC, 2021.
- 26 D. Apostolou and S. N. Welcher, *Int J Hydrogen Energy*, 2021, **46**, 6885–6900.
- 27 S. Harichandan, S. K. Kar, R. Bansal and S. K. Mishra, *Int J Hydrogen Energy*, 2023, **48**, 4845–4859.
- 28 S. Hienuki, Y. Hirayama, T. Shibutani, J. Sakamoto, J. Nakayama and A. Miyake, *Sustainability 2019, Vol. 11, Page 6339*, 2019, **11**, 6339.
- 29 K. Ono and K. Tsunemi, *Int J Hydrogen Energy*, 2017, **42**, 10697–10707.
- 30 M. Scott and G. Powells, *Int J Hydrogen Energy*, 2020, **45**, 3870–3882.
- 31 R. Zimmer and J. Welke, *Int J Hydrogen Energy*, 2012, **37**, 17502–17508.
- 32 H. L. Bentsen, J. K. Skiple, T. Gregersen, E. Derempouka and T. Skjold, *Energy Res Soc Sci*, 2023, **97**, 102985.
- 33 C. Smith, C. Bucke and D. van der Horst, *Int J Hydrogen Energy*, 2023, **48**, 8370–8385.
- 34 J. A. Gordon, N. Balta-Ozkan and S. A. Nabavi, *Int J Hydrogen Energy*, 2024, **Volume 49, Part D**, 75–104.
- 35 J. Van Alstine and C. Bastin, *Establishing the UK hydrogen corridor: Socio-economic, environmental, and regulatory issues*, University of Leeds, 2019.
- 36 J. Gordon, N. Balta-Ozkan and S. A. Nabavi, *Renewable and Sustainable Energy Reviews*, 2022, **164**, 112481.
- 37 J. A. Gordon, N. Balta-Ozkan and S. A. Nabavi, *Appl Energy*, 2022, **324**, 119715.
- 38 HM Government, *UK Hydrogen Strategy*, 2021.
- 39 S. K. Kar, R. Bansal and S. Harichandan, *Int J Hydrogen Energy*, 2022, **47**, 19999–20015.
- 40 P. Emmerich, A. G. Hülemeier, D. Jendryczko, M. J. Baumann, M. Weil and D. Baur, *Energy Policy*, 2020, **142**, 111516.
- 41 N. P. Dumbrell, S. A. Wheeler, A. Zuo and D. Adamson, *Energy Policy*, 2022, **165**, 112987.
- 42 C. Oltra, E. Dütschke, R. Sala, U. Schneider and P. Upham, *Rev Int Sociol*, 2017, **75**, e076.
- 43 Office for National Statistics, Subnational estimates of dwellings and households by tenure, England: 2020, <https://www.ons.gov.uk/peoplepopulationandcommunity/housing/articles/researchoutputsubnationaldwellingstockbytenureestimatesengland2012to2015/2020>, (accessed 2 September 2022).
- 44 J. Piddington, S. Nicol, H. Garrett and M. Custard, *The housing stock of the United Kingdom*, BRE Trust: Watford, UK, 2020.
- 45 UK Government, UK population by ethnicity: Age groups, <https://www.ethnicity-facts-figures.service.gov.uk/uk-population-by-ethnicity/demographics/age-groups/latest>, (accessed 21 March 2023).

- 46 Department for Business, Energy & Industrial Strategy, *BEIS Public Attitudes Tracker: Heat and Energy in the Home, Winter 2022*, 2022.
- 47 P. H. Li, I. Keppo and N. Strachan, *Energy*, 2018, **148**, 716–727.
- 48 G. Thomas, N. Pidgeon and K. Henwood, *Cleaner Production Letters*, 2023, **5**, 100047.
- 49 Department for Energy Security & Net Zero, Sub-regional fuel poverty in England, 2023 (2021 data), <https://www.gov.uk/government/statistics/sub-regional-fuel-poverty-2023-2021-data/sub-regional-fuel-poverty-in-england-2023-2021-data>, (accessed 28 October 2023).
- 50 J. P. Meyer and M. A. Seaman, *The Journal of Experimental Education*, 2013, **81**, 139–156.
- 51 V. Bewick, L. Cheek and J. Ball, *Crit Care*, 2004, **8**, 196.
- 52 L. Vibrans, E. Schulte, K. Morrissey, T. Bruckner and F. Scheller, *Energy Res Soc Sci*, 2023, **103**, 103212.
- 53 R. A. K. Sherwani, H. Shakeel, W. B. Awan, M. Faheem and M. Aslam, *BMC Med Res Methodol*, 2021, **21**, 1–7.
- 54 E. Whitley and J. Ball, *Crit Care*, 2002, **6**, 509–513.
- 55 J. H. Cheah, R. Thurasamy, M. A. Memon, F. Chuah and H. Ting, *Asian Journal of Business Research*, 2020, 10, I–XIX.
- 56 M. Sarstedt, J. Henseler and C. M. Ringle, in *Measurement and research methods in international marketing*, Emerald Group Publishing Limited, 2011, pp. 195–218.
- 57 K. Jedidi, H. S. Jagpal and W. S. DeSarbo, *Marketing Science*, 1997, **16**, 39–59.
- 58 J.-M. Becker, A. Rai, C. M. Ringle and F. Völckner, *MIS Quarterly*, 2013, **37**, 665–694.
- 59 M. Sarstedt and C. M. Ringle, *J Appl Stat*, 2010, **37**, 1299–1318.
- 60 J. F. Hair Jr, M. Sarstedt, L. M. Matthews and C. M. Ringle, *European Business Review*, 2016, **28**, 63–76.
- 61 W. A. Kamakura and G. J. Russell, *Source: Journal of Marketing Research*, 1989, **26**, 379–390.
- 62 A. Bhagat, N. Kshirsagar, P. Khodke, K. Dongre and S. Ali, *Procedia Comput Sci*, 2016, **79**, 24–31.
- 63 S. T. Lanza and B. L. Rhoades, *Prevention Science*, 2013, **14**, 157–168.
- 64 V. Kandiah, A. R. Binder and E. Z. Berglund, *Risk Analysis*, 2017, **37**, 2005–2022.
- 65 J. Magidson, *Canadian Journal of Marketing Research*.
- 66 W. Zhou, M. M. He, F. Wang, R. H. Xu, F. Wang and Q. Zhao, *npj Precision Oncology* 2023 7:1, 2023, **7**, 1–11.
- 67 P. Sinha, M. ChB, C. S. Calfee and K. L. Delucchi, *Crit Care Med*, 2021, **49**, 63–79.
- 68 D. L. Oberski, *Adv Data Anal Classif*, 2016, **10**, 171–182.
- 69 M. Klesel, F. Schuberth, J. Henseler and B. Niehaves, *Internet Research*, 2019, **29**, 464–477.



- 70 J. F. Hair, M. Sarstedt, C. M. Ringle and S. Gudergan, *Advanced issues in partial least squares structural equation modeling*, Sage, Second., 2017.
- 71 M. Sarstedt and C. M. Ringle, *J Appl Stat*, 2010, **37**, 1299–1318.
- 72 H. M. Van Loo, R. B. K. Wanders, K. J. Wardenaar and E. I. Fried, *Molecular Psychiatry* 2018 23:3, 2016, **23**, 495–496.
- 73 H. F. Lin, *Int J Inf Manage*, 2011, **31**, 252–260.
- 74 R. Thakur and M. Srivastava, *Internet Research*, 2014, **24**, 369–392.
- 75 L. Y. Leong, T. S. Hew, G. W. H. Tan and K. B. Ooi, *Expert Syst Appl*, 2013, **40**, 5604–5620.
- 76 A. Farooq, S. Laato and A. K. M. Najmul Islam, *J Med Internet Res*, 2020, **22**, e19128.
- 77 A. Tarhini, K. Hone, X. Liu and T. Tarhini, *Interactive Learning Environments*, 2017, **25**, 306–328.
- 78 G. W. H. Tan, K. B. Ooi, S. C. Chong and T. S. Hew, *Telematics and Informatics*, 2014, **31**, 292–307.
- 79 C. Barbarossa and P. De Pelsmacker, *Journal of Business Ethics*, 2016, **134**, 229–247.
- 80 H. Krasnova, N. F. Veltri and O. Günther, *Business and Information Systems Engineering*, 2012, **4**, 127–135.
- 81 F. Kong, J. Zhao and X. You, *Soc Indic Res*, 2013, **112**, 151–161.
- 82 I. O. Pappas, A. G. Pateli, M. N. Giannakos and V. Chrissikopoulos, *International Journal of Retail and Distribution Management*, 2014, **42**, 187–204.
- 83 P. Achterberg, *Int J Hydrogen Energy*, 2014, **39**, 18711–18717.
- 84 P. Roddis, S. Carver, M. Dallimer and G. Ziv, *Energy Res Soc Sci*, 2019, **56**, 101226.
- 85 F. D. Davis, *MIS quarterly*, 1989, **13**, 319–340.
- 86 Y. Wang and W. Qualls, *Int J Hosp Manag*, 2007, **26**, 560–573.
- 87 M. C. Lee, *Electron Commer Res Appl*, 2009, **8**, 130–141.
- 88 E. Schulte, F. Scheller, D. Sloot and T. Bruckner, *Energy Res Soc Sci*, 2022, **84**, 102339.
- 89 E. Daniel and H. Wilson, *Journal of Small Business and Enterprise Development*, 2002, **9**, 331–348.
- 90 P. M. Reyes, S. Li and J. K. Visich, *Eur J Oper Res*, 2016, **254**, 801–812.
- 91 J. Jiménez-Martínez and Y. Polo-Redondo, *Technovation*, 2004, **24**, 73–79.
- 92 A. A. Aibinu and A. M. Al-Lawati, *Autom Constr*, 2010, **19**, 714–724.
- 93 P. Dubey and K. K. Sahu, *Journal of Research in Innovative Teaching and Learning*, 2021, **14**, 310–328.
- 94 G. Kim, B. Shin and H. G. Lee, *Information Systems Journal*, 2009, **19**, 283–311.
- 95 S. Laforet and X. Li, *International journal of bank marketing*, 23(5), pp.362-380., 2005, **23**, 362–380.

- 96 Z. Gong, Z. Han, X. Li, C. Yu and J. D. Reinhardt, *Front Public Health*, 2019, **7**, 286.
- 97 J. Park, E. Amendah, Y. Lee and H. Hyun, *Hum. Factors Man*, 2019, **29**, 31–43.
- 98 E. M. Rogers, *Diffusion of Innovations*, The Free Press, New York, NY, 4th edn., 1995.
- 99 M. Abou-Shouk, P. Megicks and W. M. Lim, *Journal of Hospitality & Tourism Research*, 2013, **37**, 490–515.
- 100 A. Kai-ming Au and P. Enderwick, *Journal of Managerial Psychology*, 2000, **15**, 268–3946.
- 101 J. A. Gordon, N. Balta-Ozkan, A. Haq and S. A. Nabavi, *Energy Res Soc Sci*, 2024, **110**, 103437.
- 102 M. Sarstedt, J. F. Hair, J. H. Cheah, J. M. Becker and C. M. Ringle, *Australasian Marketing Journal (AMJ)*, 2019, **27**, 197–211.

## End Notes

---

<sup>i</sup> Also including onshore and offshore wind, wave/tidal, and biomass.

<sup>ii</sup> i.e. the electronic issuing and receipt of any bid documentation in electronic format as part of the procurement process.<sup>92</sup>

<sup>iii</sup> This study engages with relative advantage by examining technology perceptions vis-à-vis boiler and hob performance.
